# Supplementary material for: “Core-first” approach for the synthesis of star-shaped polyisoprenes with a branched core and isoprene catalyzed by half-sandwich scandium complexes
Source: Royal Society of Chemistry journal article supplement (doi:10.1039/d1py00845e), 2021-01-01
Supplement: d1py00845e1.pdf [file d1py00845e1.pdf]

# “Core-first” approach for the Synthesis of Star-shaped polyisoprene with a Hyperbranched Core and isoprene catalyzed by half-sandwich scandium complexes

Jialin Yu, Hui Niu, Yinran Wang, Yang Li \*

Department of Polymer Science and Engineering, School of Chemical Engineering,  
Dalian University of Technology, Dalian 116024 China

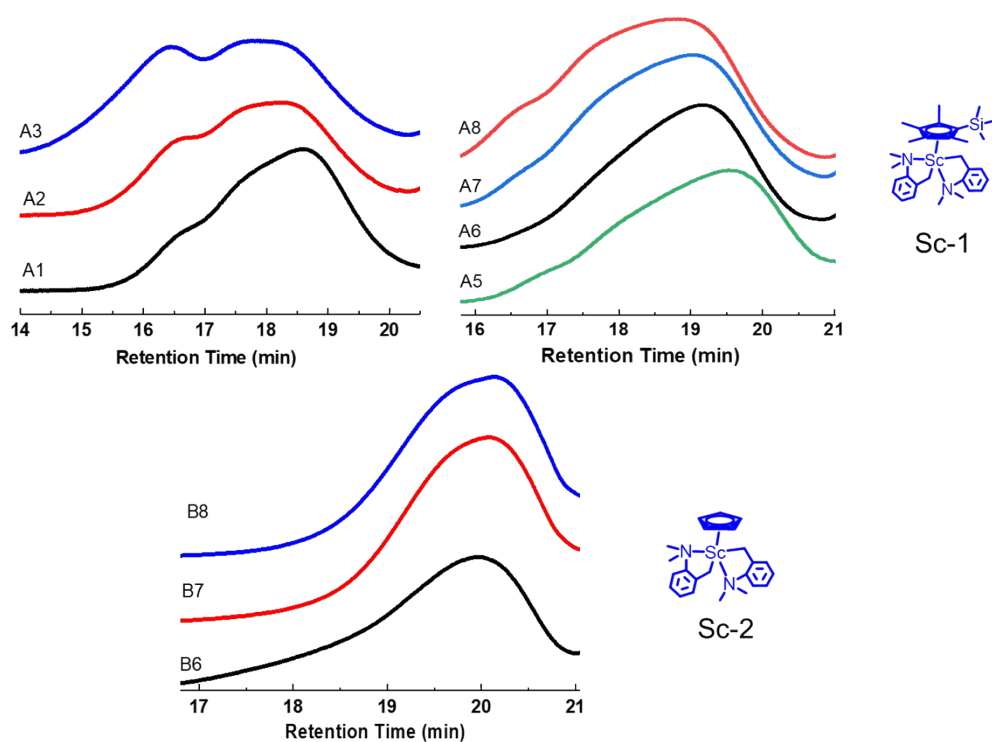

**Figure S1** SEC curves of macromonomers (Runs A1-A3, A5-A8, B5-B8) given by refractive index detector

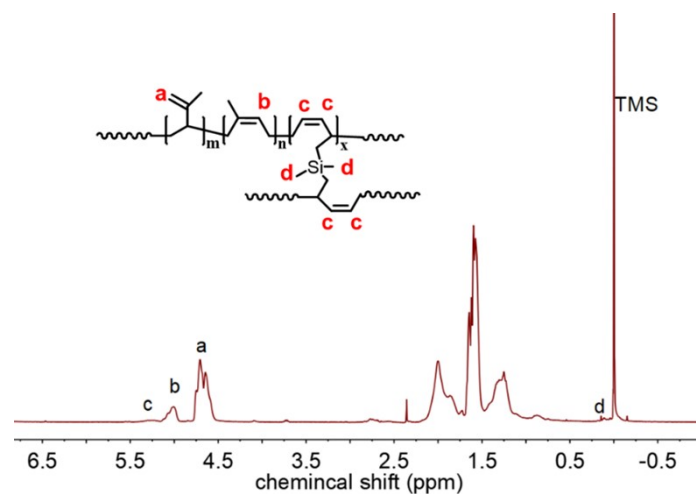

**Figure S2**  $^1\text{H}$  NMR spectrum of a typical Star-PIp (Run 2-2) in  $\text{CDCl}_3$

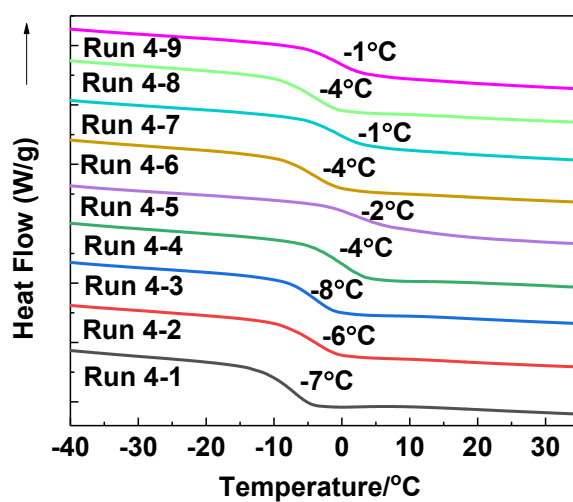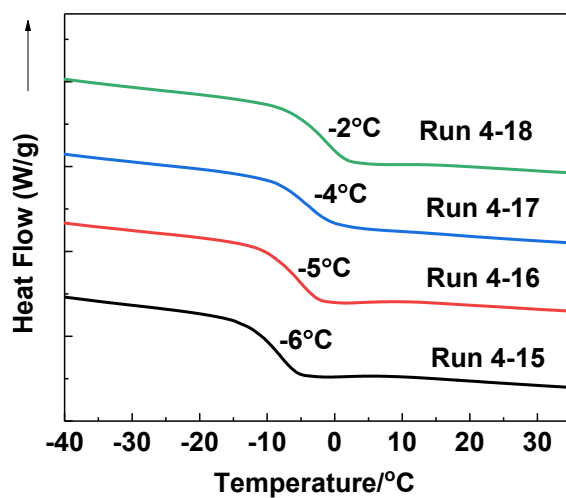

**Figure S3** DSC curves of the other typical star-PIps

**Table S1** Cartesian coordinates for important calculated structuresA [(C<sub>5</sub>Me<sub>4</sub>SiMe<sub>3</sub>)Sc(CH<sub>2</sub>C<sub>6</sub>H<sub>4</sub>NMe<sub>2</sub>-*o*)]<sup>+</sup>

| Center<br>Number | Atomic<br>Number | Atomic<br>Type | Coordinates (Angstroms) |           |           |
|------------------|------------------|----------------|-------------------------|-----------|-----------|
|                  |                  |                | X                       | Y         | Z         |
| 1                | 21               | 0              | 0.008701                | 0.227980  | -0.365170 |
| 2                | 7                | 0              | -1.343496               | 2.060575  | -0.315684 |
| 3                | 6                | 0              | -1.151460               | -0.139673 | -2.201611 |
| 4                | 1                | 0              | -0.954059               | 0.722004  | -2.849052 |
| 5                | 1                | 0              | -1.165729               | -1.056049 | -2.791099 |
| 6                | 6                | 0              | -2.297277               | -0.016464 | -1.282367 |
| 7                | 6                | 0              | -2.384392               | 1.027379  | -0.301687 |
| 8                | 6                | 0              | -3.412389               | 1.036264  | 0.660700  |
| 9                | 1                | 0              | -3.483098               | 1.848908  | 1.374272  |
| 10               | 6                | 0              | -4.350756               | 0.016886  | 0.698137  |
| 11               | 1                | 0              | -5.143088               | 0.037790  | 1.439486  |
| 12               | 6                | 0              | -4.273423               | -1.031666 | -0.232847 |
| 13               | 1                | 0              | -5.008349               | -1.830926 | -0.211554 |
| 14               | 6                | 0              | -3.271469               | -1.045210 | -1.187307 |
| 15               | 1                | 0              | -3.223531               | -1.853336 | -1.910557 |
| 16               | 6                | 0              | -1.151291               | 2.776117  | 0.968886  |
| 17               | 1                | 0              | -1.978898               | 3.462668  | 1.184717  |
| 18               | 1                | 0              | -0.231270               | 3.363739  | 0.902585  |
| 19               | 1                | 0              | -1.062932               | 2.064821  | 1.795428  |
| 20               | 6                | 0              | -1.493464               | 3.046288  | -1.419727 |
| 21               | 1                | 0              | -1.690894               | 2.530763  | -2.358131 |
| 22               | 1                | 0              | -0.570209               | 3.625042  | -1.513461 |
| 23               | 1                | 0              | -2.329438               | 3.723776  | -1.207089 |
| 24               | 6                | 0              | 1.304721                | -1.821442 | -0.251851 |
| 25               | 6                | 0              | 1.932784                | -0.771593 | 0.509280  |
| 26               | 6                | 0              | 1.066959                | -0.496219 | 1.633294  |
| 27               | 6                | 0              | -0.083118               | -1.326421 | 1.529282  |
| 28               | 6                | 0              | 0.069251                | -2.147235 | 0.362350  |
| 29               | 6                | 0              | 1.321896                | 0.518463  | 2.723052  |
| 30               | 1                | 0              | 2.271338                | 0.314849  | 3.228078  |
| 31               | 1                | 0              | 0.535275                | 0.494309  | 3.481113  |
| 32               | 1                | 0              | 1.382755                | 1.549948  | 2.348944  |
| 33               | 6                | 0              | -1.236986               | -1.423005 | 2.492183  |
| 34               | 1                | 0              | -2.196704               | -1.469991 | 1.967381  |
| 35               | 1                | 0              | -1.278743               | -0.568361 | 3.173128  |
| 36               | 1                | 0              | -1.154092               | -2.327699 | 3.107102  |
| 37               | 6                | 0              | -0.878657               | -3.236309 | -0.056346 |
| 38               | 1                | 0              | -0.570254               | -4.199829 | 0.369020  |
| 39               | 1                | 0              | -0.914427               | -3.351952 | -1.143438 |
| 40               | 1                | 0              | -1.895843               | -3.035100 | 0.288211  |
| 41               | 6                | 0              | 1.835129                | -2.456432 | -1.513517 |
| 42               | 1                | 0              | 2.850739                | -2.834873 | -1.362547 |
| 43               | 1                | 0              | 1.210180                | -3.297249 | -1.822144 |
| 44               | 1                | 0              | 1.870988                | -1.755118 | -2.356778 |
| 45               | 14               | 0              | 3.265076                | 0.388622  | -0.143226 |
| 46               | 6                | 0              | 4.477181                | -0.417712 | -1.333060 |
| 47               | 1                | 0              | 4.014372                | -0.744223 | -2.268636 |
| 48               | 1                | 0              | 5.268897                | 0.298479  | -1.583812 |
| 49               | 1                | 0              | 4.955639                | -1.289656 | -0.872474 |
| 50               | 6                | 0              | 4.208206                | 1.309989  | 1.199841  |
| 51               | 1                | 0              | 4.649924                | 0.607735  | 1.916346  |
| 52               | 1                | 0              | 5.030241                | 1.874684  | 0.743876  |
| 53               | 1                | 0              | 3.591789                | 2.017477  | 1.762053  |
| 54               | 6                | 0              | 2.213757                | 1.676716  | -1.136479 |
| 55               | 1                | 0              | 2.878361                | 2.412888  | -1.604499 |
| 56               | 1                | 0              | 1.647890                | 1.251362  | -1.987084 |
| 57               | 1                | 0              | 1.532632                | 2.288471  | -0.517092 |

B [(C<sub>5</sub>H<sub>5</sub>)Sc(CH<sub>2</sub>C<sub>6</sub>H<sub>4</sub>NMe<sub>2</sub>-o)]<sup>+</sup>

| Center Number | Atomic Number | Atomic Type | Coordinates (Angstroms) |           |           |
|---------------|---------------|-------------|-------------------------|-----------|-----------|
|               |               |             | X                       | Y         | Z         |
| 1             | 21            | 0           | -1.102328               | 0.727440  | 0.617972  |
| 2             | 7             | 0           | 1.001323                | 1.611463  | -0.015969 |
| 3             | 6             | 0           | 0.326877                | -0.116752 | 2.188733  |
| 4             | 1             | 0           | 0.815881                | 0.687059  | 2.739237  |
| 5             | 1             | 0           | 0.034148                | -0.909745 | 2.877712  |
| 6             | 6             | 0           | 1.068289                | -0.620272 | 1.028026  |
| 7             | 6             | 0           | 1.406935                | 0.214602  | -0.075547 |
| 8             | 6             | 0           | 2.066393                | -0.314433 | -1.197968 |
| 9             | 1             | 0           | 2.349808                | 0.330731  | -2.022111 |
| 10            | 6             | 0           | 2.369452                | -1.664751 | -1.265242 |
| 11            | 1             | 0           | 2.889815                | -2.057979 | -2.133473 |
| 12            | 6             | 0           | 2.007570                | -2.514530 | -0.209613 |
| 13            | 1             | 0           | 2.245014                | -3.573466 | -0.257255 |
| 14            | 6             | 0           | 1.364545                | -2.000470 | 0.899853  |
| 15            | 1             | 0           | 1.104240                | -2.655500 | 1.727372  |
| 16            | 6             | 0           | 0.946141                | 2.278495  | -1.332779 |
| 17            | 1             | 0           | 1.948956                | 2.425092  | -1.754388 |
| 18            | 1             | 0           | 0.483744                | 3.258997  | -1.208816 |
| 19            | 1             | 0           | 0.348023                | 1.691655  | -2.033307 |
| 20            | 6             | 0           | 1.877543                | 2.415086  | 0.868693  |
| 21            | 1             | 0           | 1.991150                | 1.940025  | 1.842023  |
| 22            | 1             | 0           | 1.450817                | 3.413798  | 0.998533  |
| 23            | 1             | 0           | 2.872763                | 2.515367  | 0.416475  |
| 24            | 6             | 0           | -3.177018               | 0.316201  | -0.735136 |
| 25            | 6             | 0           | -2.047176               | 0.042962  | -1.547711 |
| 26            | 6             | 0           | -1.367755               | -1.068342 | -0.992755 |
| 27            | 6             | 0           | -2.063376               | -1.466773 | 0.179941  |
| 28            | 6             | 0           | -3.190007               | -0.622455 | 0.324447  |
| 29            | 1             | 0           | -1.782849               | 0.565946  | -2.460204 |
| 30            | 1             | 0           | -3.920354               | 1.080338  | -0.924498 |
| 31            | 1             | 0           | -3.946636               | -0.706527 | 1.094498  |
| 32            | 1             | 0           | -1.798371               | -2.295378 | 0.825130  |
| 33            | 1             | 0           | -0.476984               | -1.538315 | -1.390218 |

## SI (dimethyl-di-2,4-pentadienyl-(E,E)-silane)

| Center Number | Atomic Number | Atomic Type | Coordinates (Angstroms) |           |           |
|---------------|---------------|-------------|-------------------------|-----------|-----------|
|               |               |             | X                       | Y         | Z         |
| 1             | 14            | 0           | 0.109312                | 1.240431  | 0.043823  |
| 2             | 6             | 0           | -2.540198               | 0.213678  | 0.273624  |
| 3             | 6             | 0           | -3.675235               | -0.241740 | -0.310201 |
| 4             | 1             | 0           | -2.168594               | -0.256682 | 1.159949  |
| 5             | 1             | 0           | -4.046838               | 0.228619  | -1.196527 |
| 6             | 6             | 0           | -4.430220               | -1.436227 | 0.302008  |
| 7             | 6             | 0           | -5.565258               | -1.891645 | -0.281816 |
| 8             | 1             | 0           | -4.058618               | -1.906585 | 1.188335  |
| 9             | 1             | 0           | -6.089825               | -2.721580 | 0.143550  |
| 10            | 1             | 0           | -5.936859               | -1.421288 | -1.168144 |
| 11            | 6             | 0           | -1.785214               | 1.408166  | -0.338584 |
| 12            | 1             | 0           | -1.935564               | 1.420101  | -1.397901 |
| 13            | 1             | 0           | -2.155217               | 2.318681  | 0.084453  |
| 14            | 6             | 0           | 0.381909                | 1.218792  | 1.964454  |
| 15            | 1             | 0           | 0.011906                | 2.129307  | 2.387490  |
| 16            | 1             | 0           | -0.142658               | 0.388856  | 2.389819  |
| 17            | 1             | 0           | 1.426828                | 1.126279  | 2.175369  |
| 18            | 6             | 0           | 1.060395                | 2.745175  | -0.727400 |
| 19            | 1             | 0           | 0.910046                | 2.757110  | -1.786717 |
| 20            | 1             | 0           | 0.690392                | 3.655690  | -0.304363 |
| 21            | 1             | 0           | 2.105314                | 2.652662  | -0.516485 |
| 22            | 6             | 0           | 0.780158                | -0.410410 | -0.723178 |
| 23            | 6             | 0           | 1.958746                | -1.145363 | -0.058065 |

|    |   |   |           |           |           |
|----|---|---|-----------|-----------|-----------|
| 24 | 1 | 0 | -0.039479 | -1.097147 | -0.761721 |
| 25 | 6 | 0 | 3.231087  | -0.856296 | -0.424335 |
| 26 | 1 | 0 | 1.773055  | -1.884246 | 0.693248  |
| 27 | 1 | 0 | 3.416778  | -0.117412 | -1.175646 |
| 28 | 6 | 0 | 4.409675  | -1.591250 | 0.240779  |
| 29 | 6 | 0 | 5.682016  | -1.302183 | -0.125491 |
| 30 | 1 | 0 | 4.223984  | -2.330133 | 0.992091  |
| 31 | 1 | 0 | 6.500905  | -1.812834 | 0.336630  |
| 32 | 1 | 0 | 5.867707  | -0.563300 | -0.876805 |
| 33 | 1 | 0 | 1.069208  | -0.196318 | -1.730906 |

SIATS1

| Center<br>Number | Atomic<br>Number | Atomic<br>Type | Coordinates (Angstroms) |           |           |
|------------------|------------------|----------------|-------------------------|-----------|-----------|
|                  |                  |                | X                       | Y         | Z         |
| 1                | 21               | 0              | 0.963223                | -0.392865 | -0.300338 |
| 2                | 7                | 0              | 0.756803                | -2.760806 | 0.033750  |
| 3                | 6                | 0              | 2.537622                | -1.423175 | -1.892081 |
| 4                | 1                | 0              | 2.361991                | -2.238627 | -2.592527 |
| 5                | 1                | 0              | 3.298344                | -0.760985 | -2.307150 |
| 6                | 6                | 0              | 2.984868                | -1.908129 | -0.557399 |
| 7                | 6                | 0              | 2.156619                | -2.612461 | 0.360230  |
| 8                | 6                | 0              | 2.689174                | -3.085489 | 1.572603  |
| 9                | 1                | 0              | 2.063624                | -3.645787 | 2.258559  |
| 10               | 6                | 0              | 4.017045                | -2.861629 | 1.898574  |
| 11               | 1                | 0              | 4.415428                | -3.253096 | 2.829976  |
| 12               | 6                | 0              | 4.838407                | -2.133748 | 1.027525  |
| 13               | 1                | 0              | 5.879424                | -1.953315 | 1.278855  |
| 14               | 6                | 0              | 4.321557                | -1.656486 | -0.162539 |
| 15               | 1                | 0              | 4.964163                | -1.109497 | -0.847717 |
| 16               | 6                | 0              | -0.117178               | -3.066722 | 1.181709  |
| 17               | 1                | 0              | 0.031346                | -4.092295 | 1.545489  |
| 18               | 1                | 0              | -1.155086               | -2.966545 | 0.858067  |
| 19               | 1                | 0              | 0.065327                | -2.367035 | 1.999836  |
| 20               | 6                | 0              | 0.504815                | -3.768383 | -1.020211 |
| 21               | 1                | 0              | 1.122795                | -3.584617 | -1.897324 |
| 22               | 1                | 0              | -0.548307               | -3.733847 | -1.311373 |
| 23               | 1                | 0              | 0.731349                | -4.773813 | -0.641916 |
| 24               | 6                | 0              | 2.583597                | 0.907532  | 1.045615  |
| 25               | 6                | 0              | 1.821610                | 1.836037  | 0.291128  |
| 26               | 6                | 0              | 0.481465                | 1.768443  | 0.738353  |
| 27               | 6                | 0              | 0.408233                | 0.783596  | 1.756131  |
| 28               | 6                | 0              | 1.712770                | 0.265506  | 1.957852  |
| 29               | 6                | 0              | 0.890829                | -0.504718 | -2.813286 |
| 30               | 6                | 0              | 0.192805                | 0.589045  | -2.245595 |
| 31               | 1                | 0              | 0.336925                | -1.428034 | -2.977532 |
| 32               | 1                | 0              | 1.575730                | -0.276813 | -3.623100 |
| 33               | 6                | 0              | -1.029234               | 0.472253  | -1.498689 |
| 34               | 6                | 0              | -1.609863               | -0.686231 | -1.047414 |
| 35               | 1                | 0              | -1.465908               | 1.411924  | -1.163724 |
| 36               | 1                | 0              | -1.264196               | -1.635547 | -1.462201 |
| 37               | 1                | 0              | 0.564591                | 1.588580  | -2.446978 |
| 38               | 6                | 0              | -2.875160               | -0.731510 | -0.259368 |
| 39               | 14               | 0              | -4.465102               | -0.977617 | -1.337576 |
| 40               | 1                | 0              | -3.029484               | 0.198264  | 0.302539  |
| 41               | 1                | 0              | -2.867914               | -1.549140 | 0.474121  |
| 42               | 6                | 0              | -4.553905               | 0.386075  | -2.643838 |
| 43               | 6                | 0              | -4.414528               | -2.686987 | -2.156237 |
| 44               | 6                | 0              | -5.941830               | -0.864294 | -0.123462 |
| 45               | 1                | 0              | -5.471424               | 0.290524  | -3.236236 |
| 46               | 1                | 0              | -4.556434               | 1.382656  | -2.188178 |
| 47               | 1                | 0              | -3.707827               | 0.333682  | -3.338340 |
| 48               | 1                | 0              | -4.328706               | -3.490098 | -1.414653 |
| 49               | 1                | 0              | -5.333118               | -2.866388 | -2.726863 |
| 50               | 1                | 0              | -3.576687               | -2.776314 | -2.858378 |
| 51               | 6                | 0              | -6.033684               | 0.475541  | 0.530785  |
| 52               | 1                | 0              | -5.836008               | -1.661639 | 0.624398  |

|    |    |   |           |           |           |
|----|----|---|-----------|-----------|-----------|
| 53 | 1  | 0 | -6.854969 | -1.083729 | -0.695001 |
| 54 | 6  | 0 | -5.664863 | 0.758150  | 1.794743  |
| 55 | 1  | 0 | -6.411670 | 1.290461  | -0.089440 |
| 56 | 1  | 0 | -5.303762 | -0.047185 | 2.438283  |
| 57 | 6  | 0 | -5.732269 | 2.082116  | 2.388767  |
| 58 | 6  | 0 | -5.369128 | 2.368378  | 3.647832  |
| 59 | 1  | 0 | -6.111713 | 2.880864  | 1.750085  |
| 60 | 1  | 0 | -5.445481 | 3.374463  | 4.048957  |
| 61 | 1  | 0 | -4.996832 | 1.600138  | 4.322989  |
| 62 | 14 | 0 | 2.587374  | 3.207772  | -0.847093 |
| 63 | 6  | 0 | 4.105836  | 4.017700  | 0.048389  |
| 64 | 1  | 0 | 4.850955  | 3.272055  | 0.231997  |
| 65 | 1  | 0 | 4.516483  | 4.787280  | -0.571301 |
| 66 | 1  | 0 | 3.787574  | 4.440478  | 0.978371  |
| 67 | 6  | 0 | 1.251146  | 4.566332  | -1.210982 |
| 68 | 1  | 0 | 1.634767  | 5.260609  | -1.929114 |
| 69 | 1  | 0 | 0.368096  | 4.103166  | -1.599056 |
| 70 | 1  | 0 | 1.013585  | 5.084527  | -0.305479 |
| 71 | 6  | 0 | 3.170902  | 2.411022  | -2.516908 |
| 72 | 1  | 0 | 2.358313  | 1.872848  | -2.958462 |
| 73 | 1  | 0 | 3.494006  | 3.181121  | -3.185827 |
| 74 | 1  | 0 | 3.982231  | 1.739650  | -2.327417 |
| 75 | 6  | 0 | -0.694079 | 2.609933  | 0.207702  |
| 76 | 1  | 0 | -0.440741 | 3.648292  | 0.258001  |
| 77 | 1  | 0 | -0.895474 | 2.340740  | -0.808111 |
| 78 | 1  | 0 | -1.562800 | 2.425438  | 0.804517  |
| 79 | 6  | 0 | -0.855989 | 0.387726  | 2.541389  |
| 80 | 1  | 0 | -1.230336 | 1.240556  | 3.068119  |
| 81 | 1  | 0 | -1.601873 | 0.032948  | 1.861176  |
| 82 | 1  | 0 | -0.614145 | -0.385381 | 3.240473  |
| 83 | 6  | 0 | 2.117518  | -0.786236 | 3.007430  |
| 84 | 1  | 0 | 1.893274  | -0.417635 | 3.986587  |
| 85 | 1  | 0 | 1.573566  | -1.691140 | 2.833747  |
| 86 | 1  | 0 | 3.166937  | -0.980691 | 2.931211  |
| 87 | 6  | 0 | 4.099866  | 0.672216  | 0.914643  |
| 88 | 1  | 0 | 4.306825  | 0.190853  | -0.018286 |
| 89 | 1  | 0 | 4.611143  | 1.611397  | 0.952545  |
| 90 | 1  | 0 | 4.435141  | 0.050902  | 1.718670  |

-----

2SIA TS<sup>2</sup>

| Center<br>Number | Atomic<br>Number | Atomic<br>Type | Coordinates (Angstroms) |           |           |
|------------------|------------------|----------------|-------------------------|-----------|-----------|
|                  |                  |                | X                       | Y         | Z         |
| 1                | 21               | 0              | -0.591051               | 1.240197  | 0.033235  |
| 2                | 6                | 0              | -1.988019               | -0.694741 | 1.393428  |
| 3                | 1                | 0              | -1.157864               | -1.393909 | 1.519017  |
| 4                | 6                | 0              | -2.314894               | -0.487115 | 0.000762  |
| 5                | 6                | 0              | -1.475368               | -0.707588 | -1.069069 |
| 6                | 1                | 0              | -1.871847               | -0.533529 | -2.065252 |
| 7                | 6                | 0              | -0.117515               | 3.609902  | -0.466100 |
| 8                | 6                | 0              | -1.541064               | 3.406945  | -0.536630 |
| 9                | 6                | 0              | -1.776056               | 2.550642  | -1.667238 |
| 10               | 6                | 0              | -0.525663               | 2.200305  | -2.246724 |
| 11               | 6                | 0              | 0.502611                | 2.844202  | -1.493671 |
| 12               | 1                | 0              | -3.299834               | -0.075202 | -0.219328 |
| 13               | 6                | 0              | -1.130631               | 0.788172  | 2.574218  |
| 14               | 6                | 0              | -0.236111               | 1.835762  | 2.196906  |
| 15               | 1                | 0              | -0.695213               | -0.039220 | 3.133802  |
| 16               | 1                | 0              | -2.071277               | 1.133434  | 2.992355  |
| 17               | 6                | 0              | 1.113122                | 1.608918  | 1.771362  |
| 18               | 6                | 0              | 1.620168                | 0.389075  | 1.383716  |
| 19               | 1                | 0              | 1.738123                | 2.487562  | 1.623956  |
| 20               | 1                | 0              | 1.040129                | -0.506086 | 1.626652  |
| 21               | 1                | 0              | -0.568974               | 2.860921  | 2.322505  |
| 22               | 6                | 0              | -0.108397               | -1.315179 | -0.975250 |
| 23               | 6                | 0              | 0.332349                | -2.038171 | -2.261946 |
| 24               | 1                | 0              | 0.685735                | -0.554149 | -0.736559 |
| 25               | 1                | 0              | -0.044456               | -2.028562 | -0.143668 |

|    |    |   |           |           |           |
|----|----|---|-----------|-----------|-----------|
| 26 | 1  | 0 | -0.405459 | -2.821462 | -2.460664 |
| 27 | 1  | 0 | 0.285762  | -1.342835 | -3.106823 |
| 28 | 6  | 0 | 1.731271  | -2.598568 | -2.148948 |
| 29 | 6  | 0 | 2.013640  | -3.742500 | -1.367928 |
| 30 | 6  | 0 | 2.788707  | -1.932281 | -2.775162 |
| 31 | 7  | 0 | 0.929270  | -4.449836 | -0.762438 |
| 32 | 6  | 0 | 3.345620  | -4.144211 | -1.207281 |
| 33 | 6  | 0 | 4.111471  | -2.346033 | -2.620928 |
| 34 | 1  | 0 | 2.569265  | -1.066763 | -3.398194 |
| 35 | 6  | 0 | 1.240273  | -5.129198 | 0.487383  |
| 36 | 6  | 0 | 0.259458  | -5.367512 | -1.686462 |
| 37 | 1  | 0 | 3.573261  | -5.022799 | -0.611208 |
| 38 | 6  | 0 | 4.388289  | -3.450082 | -1.820304 |
| 39 | 1  | 0 | 4.913237  | -1.813216 | -3.124496 |
| 40 | 1  | 0 | 1.856545  | -6.036247 | 0.360515  |
| 41 | 1  | 0 | 0.302244  | -5.436108 | 0.962599  |
| 42 | 1  | 0 | 1.762890  | -4.447403 | 1.164697  |
| 43 | 1  | 0 | 0.034040  | -4.868666 | -2.632106 |
| 44 | 1  | 0 | -0.681200 | -5.711247 | -1.241918 |
| 45 | 1  | 0 | 0.878210  | -6.252231 | -1.914034 |
| 46 | 1  | 0 | 5.411910  | -3.791164 | -1.689195 |
| 47 | 6  | 0 | -3.153736 | -0.996422 | 2.313917  |
| 48 | 14 | 0 | -3.944989 | -2.757065 | 2.186699  |
| 49 | 1  | 0 | -3.949725 | -0.251160 | 2.176608  |
| 50 | 6  | 0 | -2.596421 | -4.043512 | 1.842946  |
| 51 | 6  | 0 | -4.756068 | -3.088754 | 3.865559  |
| 52 | 6  | 0 | -5.324108 | -2.861669 | 0.857460  |
| 53 | 1  | 0 | -3.030476 | -5.049876 | 1.810825  |
| 54 | 1  | 0 | -2.086920 | -3.869127 | 0.888287  |
| 55 | 1  | 0 | -1.839818 | -4.040956 | 2.636928  |
| 56 | 1  | 0 | -5.516740 | -2.335209 | 4.100932  |
| 57 | 1  | 0 | -5.248138 | -4.068148 | 3.875166  |
| 58 | 1  | 0 | -4.017144 | -3.082263 | 4.675352  |
| 59 | 6  | 0 | -4.893573 | -2.817824 | -0.569504 |
| 60 | 1  | 0 | -6.071212 | -2.083885 | 1.065025  |
| 61 | 1  | 0 | -5.819503 | -3.824575 | 1.062735  |
| 62 | 6  | 0 | -5.270128 | -1.898687 | -1.478736 |
| 63 | 1  | 0 | -4.226417 | -3.617859 | -0.897483 |
| 64 | 1  | 0 | -5.960163 | -1.105376 | -1.183525 |
| 65 | 6  | 0 | -4.833526 | -1.903587 | -2.864497 |
| 66 | 6  | 0 | -5.202426 | -1.000834 | -3.787820 |
| 67 | 1  | 0 | -4.172109 | -2.720646 | -3.158006 |
| 68 | 1  | 0 | -4.865467 | -1.068044 | -4.818061 |
| 69 | 1  | 0 | -5.881516 | -0.185002 | -3.547861 |
| 70 | 1  | 0 | -2.836115 | -0.913680 | 3.362642  |
| 71 | 6  | 0 | 3.019879  | 0.157627  | 0.927438  |
| 72 | 14 | 0 | 4.237935  | -0.350533 | 2.339155  |
| 73 | 1  | 0 | 3.444094  | 1.062021  | 0.473823  |
| 74 | 1  | 0 | 3.067429  | -0.637375 | 0.171631  |
| 75 | 6  | 0 | 4.200406  | 0.949926  | 3.712445  |
| 76 | 6  | 0 | 3.758117  | -2.055178 | 3.013569  |
| 77 | 6  | 0 | 5.970675  | -0.433556 | 1.523923  |
| 78 | 1  | 0 | 4.918157  | 0.698617  | 4.502185  |
| 79 | 1  | 0 | 4.461210  | 1.944063  | 3.331938  |
| 80 | 1  | 0 | 3.210007  | 1.015814  | 4.177004  |
| 81 | 1  | 0 | 3.767293  | -2.810209 | 2.218906  |
| 82 | 1  | 0 | 4.462926  | -2.379224 | 3.788032  |
| 83 | 1  | 0 | 2.759111  | -2.045662 | 3.466019  |
| 84 | 6  | 0 | 6.430078  | 0.897886  | 1.028936  |
| 85 | 1  | 0 | 5.921490  | -1.163282 | 0.704892  |
| 86 | 1  | 0 | 6.669432  | -0.834494 | 2.271817  |
| 87 | 6  | 0 | 6.420472  | 1.302727  | -0.255541 |
| 88 | 1  | 0 | 6.776624  | 1.601989  | 1.787836  |
| 89 | 1  | 0 | 6.092571  | 0.606625  | -1.030496 |
| 90 | 6  | 0 | 6.839698  | 2.620786  | -0.699014 |
| 91 | 6  | 0 | 6.837573  | 3.030423  | -1.976493 |
| 92 | 1  | 0 | 7.181262  | 3.306638  | 0.077600  |
| 93 | 1  | 0 | 7.169683  | 4.025271  | -2.257600 |
| 94 | 1  | 0 | 6.517462  | 2.375539  | -2.784785 |

|     |    |   |           |          |           |
|-----|----|---|-----------|----------|-----------|
| 95  | 6  | 0 | 0.611794  | 4.604906 | 0.390184  |
| 96  | 1  | 0 | 0.446651  | 5.620289 | 0.007861  |
| 97  | 1  | 0 | 0.289496  | 4.606545 | 1.434982  |
| 98  | 1  | 0 | 1.692917  | 4.439678 | 0.370237  |
| 99  | 6  | 0 | 1.963251  | 2.827290 | -1.844792 |
| 100 | 1  | 0 | 2.603781  | 3.044318 | -0.985548 |
| 101 | 1  | 0 | 2.279233  | 1.859934 | -2.249388 |
| 102 | 1  | 0 | 2.186627  | 3.582697 | -2.610014 |
| 103 | 6  | 0 | -0.323707 | 1.490139 | -3.552857 |
| 104 | 1  | 0 | 0.629316  | 0.953119 | -3.592682 |
| 105 | 1  | 0 | -1.125142 | 0.778710 | -3.774310 |
| 106 | 1  | 0 | -0.310439 | 2.216281 | -4.377120 |
| 107 | 6  | 0 | -3.110347 | 2.203778 | -2.263110 |
| 108 | 1  | 0 | -3.359743 | 2.913124 | -3.063622 |
| 109 | 1  | 0 | -3.133507 | 1.205846 | -2.713117 |
| 110 | 1  | 0 | -3.919187 | 2.252946 | -1.530127 |
| 111 | 14 | 0 | -2.926764 | 4.347618 | 0.390223  |
| 112 | 6  | 0 | -3.815216 | 5.456630 | -0.863547 |
| 113 | 1  | 0 | -4.300171 | 4.884987 | -1.661395 |
| 114 | 1  | 0 | -4.589820 | 6.048186 | -0.360937 |
| 115 | 1  | 0 | -3.113406 | 6.156028 | -1.332022 |
| 116 | 6  | 0 | -2.284123 | 5.456206 | 1.788318  |
| 117 | 1  | 0 | -1.788621 | 4.905353 | 2.595794  |
| 118 | 1  | 0 | -1.601668 | 6.234515 | 1.433803  |
| 119 | 1  | 0 | -3.150047 | 5.962483 | 2.233247  |
| 120 | 6  | 0 | -4.180528 | 3.156888 | 1.187849  |
| 121 | 1  | 0 | -3.710245 | 2.524055 | 1.949898  |
| 122 | 1  | 0 | -4.957590 | 3.743829 | 1.693107  |
| 123 | 1  | 0 | -4.688092 | 2.504257 | 0.469794  |

3SIATS<sup>3</sup>

| Center<br>Number | Atomic<br>Number | Atomic<br>Type | Coordinates (Angstroms) |           |           |
|------------------|------------------|----------------|-------------------------|-----------|-----------|
|                  |                  |                | X                       | Y         | Z         |
| 1                | 21               | 0              | 2.405736                | -0.205671 | -0.673416 |
| 2                | 6                | 0              | 0.409241                | -1.411559 | -2.141075 |
| 3                | 1                | 0              | -0.259569               | -0.550905 | -2.201851 |
| 4                | 6                | 0              | 0.609285                | -1.875186 | -0.786065 |
| 5                | 6                | 0              | 0.432593                | -1.153685 | 0.375327  |
| 6                | 1                | 0              | 0.642313                | -1.663496 | 1.309795  |
| 7                | 6                | 0              | 4.800438                | 0.127217  | -0.169705 |
| 8                | 6                | 0              | 4.504412                | -1.280212 | -0.116722 |
| 9                | 6                | 0              | 3.641366                | -1.473619 | 1.019253  |
| 10               | 6                | 0              | 3.369844                | -0.209691 | 1.610662  |
| 11               | 6                | 0              | 4.075782                | 0.782964  | 0.865472  |
| 12               | 1                | 0              | 1.003562                | -2.888018 | -0.681143 |
| 13               | 6                | 0              | 1.958316                | -0.483464 | -3.250107 |
| 14               | 6                | 0              | 3.024350                | 0.343338  | -2.790256 |
| 15               | 1                | 0              | 1.134558                | 0.016216  | -3.758427 |
| 16               | 1                | 0              | 2.272640                | -1.399354 | -3.741192 |
| 17               | 6                | 0              | 2.819200                | 1.653794  | -2.241317 |
| 18               | 6                | 0              | 1.605418                | 2.124330  | -1.800070 |
| 19               | 1                | 0              | 3.705477                | 2.253097  | -2.042429 |
| 20               | 1                | 0              | 0.711573                | 1.565454  | -2.090988 |
| 21               | 1                | 0              | 4.041935                | 0.002407  | -2.948441 |
| 22               | 6                | 0              | -0.172846               | 0.216682  | 0.479452  |
| 23               | 1                | 0              | 0.570066                | 0.950772  | 0.858485  |
| 24               | 1                | 0              | -0.497779               | 0.583636  | -0.498809 |
| 25               | 6                | 0              | 0.096168                | -2.474120 | -3.173878 |
| 26               | 14               | 0              | -1.679786               | -3.254029 | -3.115340 |
| 27               | 1                | 0              | 0.817896                | -3.298301 | -3.091616 |
| 28               | 6                | 0              | -2.813858               | -2.319931 | -1.920831 |
| 29               | 6                | 0              | -2.394132               | -3.191261 | -4.867716 |
| 30               | 6                | 0              | -1.532057               | -5.091696 | -2.585989 |
| 31               | 1                | 0              | -3.812487               | -2.772196 | -1.920308 |
| 32               | 1                | 0              | -2.437229               | -2.341024 | -0.892337 |
| 33               | 1                | 0              | -2.937487               | -1.272372 | -2.219148 |
| 34               | 1                | 0              | -1.746732               | -3.709930 | -5.584424 |



|     |    |   |           |           |           |
|-----|----|---|-----------|-----------|-----------|
| 35  | 1  | 0 | -3.379921 | -3.668904 | -4.905580 |
| 36  | 1  | 0 | -2.515545 | -2.157294 | -5.211989 |
| 37  | 6  | 0 | -0.941626 | -5.303549 | -1.234043 |
| 38  | 1  | 0 | -0.948785 | -5.618974 | -3.352625 |
| 39  | 1  | 0 | -2.551727 | -5.503420 | -2.626350 |
| 40  | 6  | 0 | 0.265185  | -5.847376 | -0.981407 |
| 41  | 1  | 0 | -1.550795 | -4.988226 | -0.383999 |
| 42  | 1  | 0 | 0.878320  | -6.195776 | -1.814783 |
| 43  | 6  | 0 | 0.805194  | -6.045146 | 0.352820  |
| 44  | 6  | 0 | 1.990661  | -6.616681 | 0.620588  |
| 45  | 1  | 0 | 0.176101  | -5.717178 | 1.182295  |
| 46  | 1  | 0 | 2.335381  | -6.764228 | 1.639742  |
| 47  | 1  | 0 | 2.638710  | -6.983279 | -0.172970 |
| 48  | 1  | 0 | 0.204523  | -2.062468 | -4.185887 |
| 49  | 6  | 0 | 1.361362  | 3.470506  | -1.209056 |
| 50  | 14 | 0 | 0.891036  | 4.814534  | -2.517237 |
| 51  | 1  | 0 | 2.248042  | 3.848705  | -0.685899 |
| 52  | 1  | 0 | 0.541556  | 3.435098  | -0.479646 |
| 53  | 6  | 0 | 2.295680  | 4.983499  | -3.772815 |
| 54  | 6  | 0 | -0.723534 | 4.328875  | -3.383093 |
| 55  | 6  | 0 | 0.646535  | 6.448094  | -1.545028 |
| 56  | 1  | 0 | 2.060910  | 5.756937  | -4.513518 |
| 57  | 1  | 0 | 3.238017  | 5.263732  | -3.288490 |
| 58  | 1  | 0 | 2.461098  | 4.046852  | -4.317302 |
| 59  | 1  | 0 | -1.539582 | 4.190858  | -2.664265 |
| 60  | 1  | 0 | -1.032617 | 5.108743  | -4.088729 |
| 61  | 1  | 0 | -0.611611 | 3.399464  | -3.954259 |
| 62  | 6  | 0 | 1.891317  | 6.895563  | -0.852301 |
| 63  | 1  | 0 | -0.171056 | 6.300171  | -0.826862 |
| 64  | 1  | 0 | 0.306321  | 7.207457  | -2.263846 |
| 65  | 6  | 0 | 2.131122  | 6.798391  | 0.469187  |
| 66  | 1  | 0 | 2.673439  | 7.315381  | -1.487821 |
| 67  | 1  | 0 | 1.353565  | 6.399138  | 1.124104  |
| 68  | 6  | 0 | 3.368060  | 7.213264  | 1.107605  |
| 69  | 6  | 0 | 3.611095  | 7.124385  | 2.423822  |
| 70  | 1  | 0 | 4.135602  | 7.627852  | 0.452519  |
| 71  | 1  | 0 | 4.550812  | 7.456828  | 2.854466  |
| 72  | 1  | 0 | 2.869461  | 6.728629  | 3.115173  |
| 73  | 6  | 0 | 5.847133  | 0.802667  | -1.007951 |
| 74  | 1  | 0 | 6.844063  | 0.594210  | -0.598533 |
| 75  | 1  | 0 | 5.860751  | 0.471380  | -2.049019 |
| 76  | 1  | 0 | 5.732731  | 1.890569  | -1.001647 |
| 77  | 6  | 0 | 4.160429  | 2.235345  | 1.238631  |
| 78  | 1  | 0 | 4.418817  | 2.872501  | 0.388111  |
| 79  | 1  | 0 | 3.220004  | 2.611231  | 1.654731  |
| 80  | 1  | 0 | 4.932489  | 2.393472  | 2.003433  |
| 81  | 6  | 0 | 2.649518  | 0.036335  | 2.902823  |
| 82  | 1  | 0 | 2.188306  | 1.028873  | 2.937887  |
| 83  | 1  | 0 | 1.865698  | -0.699366 | 3.100087  |
| 84  | 1  | 0 | 3.346443  | -0.015794 | 3.749448  |
| 85  | 6  | 0 | 3.227494  | -2.791801 | 1.607125  |
| 86  | 1  | 0 | 4.025951  | -3.179075 | 2.253559  |
| 87  | 1  | 0 | 2.338192  | -2.701683 | 2.238565  |
| 88  | 1  | 0 | 3.024946  | -3.559031 | 0.854903  |
| 89  | 14 | 0 | 5.324091  | -2.708638 | -1.091161 |
| 90  | 6  | 0 | 6.365651  | -3.736906 | 0.112743  |
| 91  | 1  | 0 | 5.756834  | -4.234187 | 0.874518  |
| 92  | 1  | 0 | 6.909683  | -4.515488 | -0.435500 |
| 93  | 1  | 0 | 7.105465  | -3.112826 | 0.626772  |
| 94  | 6  | 0 | 6.469261  | -2.112002 | -2.480587 |
| 95  | 1  | 0 | 5.950605  | -1.546990 | -3.263596 |
| 96  | 1  | 0 | 7.304616  | -1.507180 | -2.114867 |
| 97  | 1  | 0 | 6.897956  | -3.000952 | -2.960274 |
| 98  | 6  | 0 | 4.018969  | -3.822189 | -1.913228 |
| 99  | 1  | 0 | 3.392027  | -3.258444 | -2.614835 |
| 100 | 1  | 0 | 4.527991  | -4.602296 | -2.493134 |
| 101 | 1  | 0 | 3.362650  | -4.328583 | -1.197845 |
| 102 | 6  | 0 | -1.424749 | 0.328444  | 1.424799  |
| 103 | 6  | 0 | -1.153793 | -0.140009 | 2.860706  |

|     |    |   |           |           |           |
|-----|----|---|-----------|-----------|-----------|
| 104 | 14 | 0 | -2.632842 | -0.190823 | 4.085499  |
| 105 | 1  | 0 | -0.372785 | 0.482978  | 3.318939  |
| 106 | 1  | 0 | -0.755198 | -1.164443 | 2.856826  |
| 107 | 6  | 0 | -3.185406 | 1.537444  | 4.628665  |
| 108 | 6  | 0 | -4.081222 | -1.156495 | 3.335557  |
| 109 | 6  | 0 | -2.001528 | -1.156995 | 5.622688  |
| 110 | 1  | 0 | -3.951640 | 1.462950  | 5.409697  |
| 111 | 1  | 0 | -2.350942 | 2.118830  | 5.037694  |
| 112 | 1  | 0 | -3.611289 | 2.102457  | 3.793646  |
| 113 | 1  | 0 | -3.766839 | -2.155279 | 3.009230  |
| 114 | 1  | 0 | -4.869844 | -1.291043 | 4.085776  |
| 115 | 1  | 0 | -4.529470 | -0.644260 | 2.476130  |
| 116 | 6  | 0 | -0.784501 | -0.560610 | 6.245139  |
| 117 | 1  | 0 | -1.817042 | -2.198955 | 5.328201  |
| 118 | 1  | 0 | -2.832863 | -1.173221 | 6.343436  |
| 119 | 6  | 0 | 0.447285  | -1.105253 | 6.242876  |
| 120 | 1  | 0 | -0.914624 | 0.409170  | 6.730433  |
| 121 | 1  | 0 | 0.594683  | -2.086885 | 5.787227  |
| 122 | 6  | 0 | 1.615510  | -0.482569 | 6.840163  |
| 123 | 6  | 0 | 2.842064  | -1.027109 | 6.869357  |
| 124 | 1  | 0 | 1.459073  | 0.493754  | 7.301466  |
| 125 | 1  | 0 | 3.678682  | -0.524109 | 7.345113  |
| 126 | 1  | 0 | 3.040938  | -2.006929 | 6.439013  |
| 127 | 6  | 0 | -1.883860 | 1.764616  | 1.392858  |
| 128 | 6  | 0 | -2.871154 | 2.300703  | 0.661336  |
| 129 | 1  | 0 | -1.312407 | 2.433150  | 2.040926  |
| 130 | 1  | 0 | -3.040607 | 3.373860  | 0.772885  |
| 131 | 6  | 0 | -3.804021 | 1.618103  | -0.294637 |
| 132 | 6  | 0 | -5.284731 | 1.941088  | -0.001403 |
| 133 | 1  | 0 | -3.575115 | 1.950179  | -1.318878 |
| 134 | 1  | 0 | -3.669172 | 0.530771  | -0.285340 |
| 135 | 1  | 0 | -5.519264 | 1.589769  | 1.005637  |
| 136 | 1  | 0 | -5.418347 | 3.031750  | -0.005604 |
| 137 | 6  | 0 | -6.207100 | 1.306968  | -1.016994 |
| 138 | 6  | 0 | -6.978421 | 0.162138  | -0.719904 |
| 139 | 6  | 0 | -6.250237 | 1.826728  | -2.314664 |
| 140 | 7  | 0 | -6.976535 | -0.353409 | 0.612757  |
| 141 | 6  | 0 | -7.727619 | -0.438515 | -1.740980 |
| 142 | 6  | 0 | -7.002518 | 1.228665  | -3.322861 |
| 143 | 1  | 0 | -5.671005 | 2.721288  | -2.539849 |
| 144 | 6  | 0 | -7.178089 | -1.787210 | 0.735877  |
| 145 | 6  | 0 | -7.870194 | 0.376051  | 1.510380  |
| 146 | 1  | 0 | -8.326107 | -1.317508 | -1.520349 |
| 147 | 6  | 0 | -7.734256 | 0.080296  | -3.033628 |
| 148 | 1  | 0 | -7.016178 | 1.655684  | -4.322070 |
| 149 | 1  | 0 | -8.217124 | -2.112494 | 0.547265  |
| 150 | 1  | 0 | -6.920188 | -2.092322 | 1.756281  |
| 151 | 1  | 0 | -6.518465 | -2.316200 | 0.041631  |
| 152 | 1  | 0 | -7.697861 | 1.452420  | 1.429481  |
| 153 | 1  | 0 | -7.675913 | 0.071646  | 2.545261  |
| 154 | 1  | 0 | -8.934953 | 0.186408  | 1.287455  |
| 155 | 1  | 0 | -8.327976 | -0.402987 | -3.805423 |
| 156 | 1  | 0 | -2.191961 | -0.314471 | 0.976601  |

2SIA2SIA TS

| Center<br>Number | Atomic<br>Number | Atomic<br>Type | Coordinates (Angstroms) |           |           |
|------------------|------------------|----------------|-------------------------|-----------|-----------|
|                  |                  |                | X                       | Y         | Z         |
| 1                | 21               | 0              | -5.710965               | -0.796555 | 0.396694  |
| 2                | 6                | 0              | -7.046893               | 1.249113  | -1.712703 |
| 3                | 1                | 0              | -6.153212               | 1.869640  | -1.568962 |
| 4                | 6                | 0              | -7.655546               | 0.910321  | -0.382937 |
| 5                | 6                | 0              | -7.212921               | 1.198934  | 0.863417  |
| 6                | 1                | 0              | -7.854666               | 0.905035  | 1.693030  |
| 7                | 6                | 0              | -4.628891               | -2.683877 | 1.461122  |
| 8                | 6                | 0              | -5.962717               | -3.064881 | 1.072871  |
| 9                | 6                | 0              | -6.858396               | -2.283968 | 1.890994  |
| 10               | 6                | 0              | -6.091277               | -1.440288 | 2.742482  |

|    |    |   |            |           |           |
|----|----|---|------------|-----------|-----------|
| 11 | 6  | 0 | -4.708940  | -1.675526 | 2.461779  |
| 12 | 1  | 0 | -8.605053  | 0.373604  | -0.441997 |
| 13 | 6  | 0 | -6.656969  | -0.045909 | -2.491285 |
| 14 | 6  | 0 | -5.771770  | -1.144242 | -1.883578 |
| 15 | 1  | 0 | -6.199572  | 0.294572  | -3.432615 |
| 16 | 1  | 0 | -7.599550  | -0.529955 | -2.775244 |
| 17 | 6  | 0 | -4.385158  | -1.012543 | -1.598825 |
| 18 | 6  | 0 | -3.775270  | 0.050007  | -0.943769 |
| 19 | 1  | 0 | -3.795809  | -1.930915 | -1.657099 |
| 20 | 1  | 0 | -4.295329  | 1.016100  | -0.958687 |
| 21 | 1  | 0 | -6.041651  | -2.128136 | -2.262499 |
| 22 | 6  | 0 | -5.970365  | 1.964411  | 1.239078  |
| 23 | 1  | 0 | -5.184873  | 1.330996  | 1.699790  |
| 24 | 1  | 0 | -5.521332  | 2.506568  | 0.404006  |
| 25 | 6  | 0 | -8.055880  | 2.043791  | -2.576649 |
| 26 | 14 | 0 | -8.640716  | 3.823828  | -2.115001 |
| 27 | 1  | 0 | -8.953731  | 1.425590  | -2.726557 |
| 28 | 6  | 0 | -7.288565  | 4.771695  | -1.180951 |
| 29 | 6  | 0 | -9.012800  | 4.684676  | -3.758415 |
| 30 | 6  | 0 | -10.271066 | 3.800165  | -1.099378 |
| 31 | 1  | 0 | -7.584386  | 5.819686  | -1.053969 |
| 32 | 1  | 0 | -7.104733  | 4.363162  | -0.181114 |
| 33 | 1  | 0 | -6.341919  | 4.769195  | -1.734794 |
| 34 | 1  | 0 | -9.769567  | 4.140065  | -4.334956 |
| 35 | 1  | 0 | -9.393178  | 5.698863  | -3.591419 |
| 36 | 1  | 0 | -8.114173  | 4.766746  | -4.381035 |
| 37 | 6  | 0 | -10.159482 | 3.390254  | 0.328296  |
| 38 | 1  | 0 | -10.994652 | 3.170115  | -1.633677 |
| 39 | 1  | 0 | -10.653921 | 4.830484  | -1.159665 |
| 40 | 6  | 0 | -10.674081 | 2.272325  | 0.876242  |
| 41 | 1  | 0 | -9.614904  | 4.074692  | 0.982803  |
| 42 | 1  | 0 | -11.250178 | 1.585032  | 0.253302  |
| 43 | 6  | 0 | -10.531050 | 1.923204  | 2.279248  |
| 44 | 6  | 0 | -11.003983 | 0.799855  | 2.846214  |
| 45 | 1  | 0 | -10.016024 | 2.653797  | 2.906316  |
| 46 | 1  | 0 | -10.900726 | 0.611953  | 3.911029  |
| 47 | 1  | 0 | -11.558467 | 0.060853  | 2.270903  |
| 48 | 1  | 0 | -7.608081  | 2.140643  | -3.576562 |
| 49 | 6  | 0 | -2.301456  | 0.129413  | -0.645192 |
| 50 | 14 | 0 | -1.335612  | 1.019378  | -2.059617 |
| 51 | 1  | 0 | -1.883061  | -0.878749 | -0.524458 |
| 52 | 1  | 0 | -2.114831  | 0.671327  | 0.292520  |
| 53 | 6  | 0 | -1.511157  | 0.018819  | -3.653438 |
| 54 | 6  | 0 | -2.024042  | 2.770705  | -2.280820 |
| 55 | 1  | 0 | -1.008267  | 0.519613  | -4.489109 |
| 56 | 1  | 0 | -1.083241  | -0.985264 | -3.555116 |
| 57 | 1  | 0 | -2.565168  | -0.094269 | -3.931028 |
| 58 | 1  | 0 | -1.964046  | 3.352088  | -1.353046 |
| 59 | 1  | 0 | -1.462144  | 3.315980  | -3.047975 |
| 60 | 1  | 0 | -3.071528  | 2.752362  | -2.603506 |
| 61 | 6  | 0 | -3.343162  | -3.311491 | 1.005826  |
| 62 | 1  | 0 | -3.149510  | -4.230724 | 1.574953  |
| 63 | 1  | 0 | -3.358852  | -3.587469 | -0.050384 |
| 64 | 1  | 0 | -2.488830  | -2.648059 | 1.172390  |
| 65 | 6  | 0 | -3.554924  | -1.062484 | 3.204267  |
| 66 | 1  | 0 | -2.664140  | -0.958876 | 2.576321  |
| 67 | 1  | 0 | -3.799290  | -0.072158 | 3.603382  |
| 68 | 1  | 0 | -3.274162  | -1.686990 | 4.062821  |
| 69 | 6  | 0 | -6.610494  | -0.566182 | 3.848027  |
| 70 | 1  | 0 | -6.027603  | 0.353570  | 3.970827  |
| 71 | 1  | 0 | -7.657404  | -0.283829 | 3.705980  |
| 72 | 1  | 0 | -6.555606  | -1.101479 | 4.804992  |
| 73 | 6  | 0 | -8.359552  | -2.378773 | 1.900403  |
| 74 | 1  | 0 | -8.684192  | -3.298734 | 2.403572  |
| 75 | 1  | 0 | -8.821719  | -1.544180 | 2.435084  |
| 76 | 1  | 0 | -8.784420  | -2.403530 | 0.892492  |
| 77 | 14 | 0 | -6.487530  | -4.590386 | 0.031005  |
| 78 | 6  | 0 | -6.749756  | -6.011336 | 1.255042  |
| 79 | 1  | 0 | -7.528150  | -5.776160 | 1.989463  |

|     |    |   |           |           |           |
|-----|----|---|-----------|-----------|-----------|
| 80  | 1  | 0 | -7.058178 | -6.920230 | 0.724896  |
| 81  | 1  | 0 | -5.830615 | -6.241592 | 1.805568  |
| 82  | 6  | 0 | -5.168946 | -5.113128 | -1.230932 |
| 83  | 1  | 0 | -4.865313 | -4.305552 | -1.907240 |
| 84  | 1  | 0 | -4.272451 | -5.528570 | -0.760239 |
| 85  | 1  | 0 | -5.598754 | -5.907019 | -1.854274 |
| 86  | 6  | 0 | -8.096414 | -4.285390 | -0.931253 |
| 87  | 1  | 0 | -8.096107 | -3.335217 | -1.478047 |
| 88  | 1  | 0 | -8.214799 | -5.085198 | -1.672471 |
| 89  | 1  | 0 | -8.982827 | -4.313384 | -0.290051 |
| 90  | 6  | 0 | 0.536609  | 1.211205  | -1.619542 |
| 91  | 6  | 0 | 1.309906  | -0.057216 | -1.429674 |
| 92  | 6  | 0 | 1.786367  | -0.853203 | -2.444065 |
| 93  | 1  | 0 | 1.321607  | -0.462196 | -0.414783 |
| 94  | 6  | 0 | 2.569976  | -2.039887 | -2.252165 |
| 95  | 1  | 0 | 1.680822  | -0.497271 | -3.467196 |
| 96  | 21 | 0 | 4.041229  | -0.482064 | -1.478867 |
| 97  | 6  | 0 | 2.705543  | -2.692360 | -0.993615 |
| 98  | 1  | 0 | 3.016131  | -2.507104 | -3.123473 |
| 99  | 1  | 0 | 1.827626  | -2.712836 | -0.349183 |
| 100 | 1  | 0 | 3.236598  | -3.638709 | -1.024118 |
| 101 | 1  | 0 | 3.328940  | 2.843327  | -3.098310 |
| 102 | 6  | 0 | 3.616325  | 2.130212  | -3.878464 |
| 103 | 6  | 0 | 4.528879  | 1.057330  | -3.356634 |
| 104 | 1  | 0 | 2.698068  | 1.723008  | -4.312711 |
| 105 | 1  | 0 | 4.113385  | 2.708345  | -4.668781 |
| 106 | 6  | 0 | 4.651866  | -0.270031 | -3.858012 |
| 107 | 6  | 0 | 5.554785  | 1.262653  | -2.384733 |
| 108 | 6  | 0 | 5.721162  | -0.928634 | -3.155035 |
| 109 | 6  | 0 | 3.918311  | -0.773908 | -5.067340 |
| 110 | 6  | 0 | 6.293549  | 0.053246  | -2.270735 |
| 111 | 6  | 0 | 5.909809  | 2.583911  | -1.770533 |
| 112 | 14 | 0 | 6.520051  | -2.634015 | -3.519352 |
| 113 | 1  | 0 | 4.565160  | -0.700113 | -5.950986 |
| 114 | 1  | 0 | 3.609685  | -1.819407 | -4.993589 |
| 115 | 1  | 0 | 3.030536  | -0.172912 | -5.286098 |
| 116 | 6  | 0 | 7.565211  | -0.090871 | -1.486238 |
| 117 | 1  | 0 | 5.036638  | 3.233268  | -1.647714 |
| 118 | 1  | 0 | 6.390084  | 2.485916  | -0.793826 |
| 119 | 1  | 0 | 6.618794  | 3.125928  | -2.409672 |
| 120 | 6  | 0 | 8.255554  | -2.341050 | -4.216178 |
| 121 | 6  | 0 | 5.547936  | -3.660572 | -4.783212 |
| 122 | 6  | 0 | 6.627431  | -3.688239 | -1.939863 |
| 123 | 1  | 0 | 8.425680  | 0.118626  | -2.134907 |
| 124 | 1  | 0 | 7.625325  | 0.622698  | -0.658837 |
| 125 | 1  | 0 | 7.711908  | -1.092954 | -1.075007 |
| 126 | 1  | 0 | 8.926709  | -1.870953 | -3.490542 |
| 127 | 1  | 0 | 8.704694  | -3.297546 | -4.509309 |
| 128 | 1  | 0 | 8.221275  | -1.703431 | -5.106754 |
| 129 | 1  | 0 | 4.536144  | -3.923217 | -4.452988 |
| 130 | 1  | 0 | 5.477806  | -3.178372 | -5.762955 |
| 131 | 1  | 0 | 6.089668  | -4.604017 | -4.926317 |
| 132 | 1  | 0 | 5.636574  | -3.870904 | -1.505760 |
| 133 | 1  | 0 | 7.050390  | -4.668053 | -2.194680 |
| 134 | 1  | 0 | 7.267399  | -3.253680 | -1.165010 |
| 135 | 6  | 0 | 3.686513  | -2.021509 | 0.781030  |
| 136 | 1  | 0 | 2.803700  | -1.505296 | 1.162981  |
| 137 | 6  | 0 | 4.859052  | -1.177759 | 0.732309  |
| 138 | 6  | 0 | 3.873535  | -3.398219 | 1.379826  |
| 139 | 6  | 0 | 4.889477  | 0.199289  | 0.687333  |
| 140 | 1  | 0 | 5.818092  | -1.695057 | 0.663661  |
| 141 | 14 | 0 | 4.102401  | -3.487682 | 3.307275  |
| 142 | 1  | 0 | 4.747274  | -3.886791 | 0.927707  |
| 143 | 1  | 0 | 3.006714  | -4.033067 | 1.154001  |
| 144 | 1  | 0 | 5.864327  | 0.673519  | 0.646719  |
| 145 | 6  | 0 | 3.705505  | 1.108505  | 0.845863  |
| 146 | 6  | 0 | 3.729774  | -1.816508 | 4.121030  |
| 147 | 6  | 0 | 2.906770  | -4.801929 | 3.962916  |
| 148 | 6  | 0 | 5.894497  | -4.034743 | 3.698439  |

|     |    |   |           |           |           |
|-----|----|---|-----------|-----------|-----------|
| 149 | 1  | 0 | 3.534022  | 1.702010  | -0.078170 |
| 150 | 1  | 0 | 2.787695  | 0.539580  | 1.025288  |
| 151 | 6  | 0 | 3.817480  | 2.149221  | 2.019748  |
| 152 | 1  | 0 | 3.840002  | -1.896306 | 5.208865  |
| 153 | 1  | 0 | 4.409852  | -1.030561 | 3.774771  |
| 154 | 1  | 0 | 2.701158  | -1.492775 | 3.920997  |
| 155 | 1  | 0 | 3.084174  | -5.775400 | 3.491136  |
| 156 | 1  | 0 | 3.026067  | -4.933516 | 5.044479  |
| 157 | 1  | 0 | 1.862240  | -4.524205 | 3.776814  |
| 158 | 6  | 0 | 6.952542  | -3.110060 | 3.197812  |
| 159 | 1  | 0 | 6.035967  | -5.044494 | 3.290537  |
| 160 | 1  | 0 | 5.955486  | -4.127497 | 4.793237  |
| 161 | 6  | 0 | 5.043587  | 3.065613  | 1.908653  |
| 162 | 6  | 0 | 2.537572  | 2.944510  | 2.041392  |
| 163 | 1  | 0 | 3.899757  | 1.555121  | 2.937620  |
| 164 | 6  | 0 | 7.822594  | -3.381313 | 2.205283  |
| 165 | 1  | 0 | 7.023607  | -2.139470 | 3.693598  |
| 166 | 14 | 0 | 5.349683  | 4.341322  | 3.317690  |
| 167 | 1  | 0 | 5.007121  | 3.629520  | 0.966086  |
| 168 | 1  | 0 | 5.961218  | 2.462861  | 1.861386  |
| 169 | 6  | 0 | 1.509930  | 2.837870  | 2.895307  |
| 170 | 1  | 0 | 2.465537  | 3.700661  | 1.256278  |
| 171 | 1  | 0 | 7.790328  | -4.358913 | 1.720368  |
| 172 | 6  | 0 | 8.855517  | -2.464272 | 1.753661  |
| 173 | 6  | 0 | 4.211878  | 5.847418  | 3.161579  |
| 174 | 6  | 0 | 5.141173  | 3.517779  | 5.012291  |
| 175 | 6  | 0 | 7.173754  | 4.902492  | 3.118711  |
| 176 | 1  | 0 | 0.673103  | 3.522221  | 2.746843  |
| 177 | 6  | 0 | 1.364510  | 1.913183  | 4.065218  |
| 178 | 6  | 0 | 9.752961  | -2.740933 | 0.793664  |
| 179 | 1  | 0 | 8.902519  | -1.499281 | 2.261357  |
| 180 | 1  | 0 | 4.480952  | 6.604766  | 3.907495  |
| 181 | 1  | 0 | 4.293931  | 6.314122  | 2.173082  |
| 182 | 1  | 0 | 3.162779  | 5.579357  | 3.322844  |
| 183 | 1  | 0 | 5.778310  | 2.631349  | 5.114381  |
| 184 | 1  | 0 | 5.419699  | 4.214904  | 5.811132  |
| 185 | 1  | 0 | 4.103471  | 3.214164  | 5.191179  |
| 186 | 6  | 0 | 7.475698  | 5.458693  | 1.767328  |
| 187 | 1  | 0 | 7.828250  | 4.049803  | 3.344306  |
| 188 | 1  | 0 | 7.358678  | 5.658535  | 3.896206  |
| 189 | 1  | 0 | 0.460266  | 1.297402  | 3.965422  |
| 190 | 1  | 0 | 2.216562  | 1.240589  | 4.194904  |
| 191 | 1  | 0 | 10.526152 | -2.031475 | 0.514337  |
| 192 | 1  | 0 | 9.763922  | -3.701994 | 0.283446  |
| 193 | 6  | 0 | 8.250619  | 4.875843  | 0.832671  |
| 194 | 1  | 0 | 7.013491  | 6.417818  | 1.524273  |
| 195 | 1  | 0 | 8.748691  | 3.932154  | 1.066251  |
| 196 | 6  | 0 | 8.506843  | 5.439801  | -0.481272 |
| 197 | 6  | 0 | 9.299208  | 4.882972  | -1.410656 |
| 198 | 1  | 0 | 8.020195  | 6.391080  | -0.701636 |
| 199 | 1  | 0 | 9.474231  | 5.358939  | -2.370880 |
| 200 | 1  | 0 | 9.823800  | 3.947258  | -1.226048 |
| 201 | 1  | 0 | 0.612530  | 1.845785  | -0.727475 |
| 202 | 1  | 0 | 0.950201  | 1.795617  | -2.452695 |
| 203 | 1  | 0 | 1.244300  | 2.484872  | 4.994565  |
| 204 | 1  | 0 | -6.214234 | 2.688144  | 2.025174  |

SIBTS<sup>1</sup>

| Center<br>Number | Atomic<br>Number | Atomic<br>Type | Coordinates (Angstroms) |           |           |
|------------------|------------------|----------------|-------------------------|-----------|-----------|
|                  |                  |                | X                       | Y         | Z         |
| 1                | 21               | 0              | -1.461563               | 0.128346  | 0.691746  |
| 2                | 7                | 0              | -1.813734               | -0.931147 | -1.423501 |
| 3                | 6                | 0              | -3.272813               | -1.467785 | 1.071907  |
| 4                | 1                | 0              | -3.223693               | -2.522509 | 0.807782  |
| 5                | 1                | 0              | -3.878702               | -1.348896 | 1.970179  |
| 6                | 6                | 0              | -3.808316               | -0.615728 | -0.016979 |

|    |    |   |           |           |           |
|----|----|---|-----------|-----------|-----------|
| 7  | 6  | 0 | -3.146881 | -0.395369 | -1.257564 |
| 8  | 6  | 0 | -3.759148 | 0.384684  | -2.253825 |
| 9  | 1  | 0 | -3.267229 | 0.531230  | -3.208849 |
| 10 | 6  | 0 | -5.000166 | 0.962638  | -2.039013 |
| 11 | 1  | 0 | -5.465478 | 1.545176  | -2.828696 |
| 12 | 6  | 0 | -5.647602 | 0.794812  | -0.807720 |
| 13 | 1  | 0 | -6.618734 | 1.248497  | -0.633122 |
| 14 | 6  | 0 | -5.050570 | 0.035750  | 0.181254  |
| 15 | 1  | 0 | -5.561598 | -0.113671 | 1.128920  |
| 16 | 6  | 0 | -1.022279 | -0.290469 | -2.492016 |
| 17 | 1  | 0 | -1.396118 | -0.557208 | -3.489302 |
| 18 | 1  | 0 | 0.010908  | -0.632255 | -2.410772 |
| 19 | 1  | 0 | -1.039270 | 0.795230  | -2.379251 |
| 20 | 6  | 0 | -1.794298 | -2.394020 | -1.649048 |
| 21 | 1  | 0 | -2.370057 | -2.917897 | -0.888167 |
| 22 | 1  | 0 | -0.761200 | -2.751302 | -1.626397 |
| 23 | 1  | 0 | -2.224330 | -2.628732 | -2.631423 |
| 24 | 6  | 0 | -0.350968 | 2.313375  | 1.099651  |
| 25 | 6  | 0 | -1.210622 | 2.473480  | -0.016276 |
| 26 | 6  | 0 | -2.542599 | 2.301428  | 0.428646  |
| 27 | 6  | 0 | -2.507595 | 2.012319  | 1.817067  |
| 28 | 6  | 0 | -1.152429 | 2.039826  | 2.233430  |
| 29 | 6  | 0 | -1.423615 | -1.947196 | 2.162640  |
| 30 | 6  | 0 | -0.497070 | -0.973622 | 2.574880  |
| 31 | 1  | 0 | -1.110099 | -2.681987 | 1.423749  |
| 32 | 1  | 0 | -2.106015 | -2.339994 | 2.907512  |
| 33 | 6  | 0 | 0.650410  | -0.589628 | 1.811608  |
| 34 | 6  | 0 | 0.902121  | -0.913467 | 0.495288  |
| 35 | 1  | 0 | 1.300662  | 0.142022  | 2.290618  |
| 36 | 1  | 0 | 0.340269  | -1.746155 | 0.060324  |
| 37 | 1  | 0 | -0.645627 | -0.501521 | 3.541260  |
| 38 | 1  | 0 | -0.900895 | 2.730290  | -1.023004 |
| 39 | 1  | 0 | 0.727804  | 2.408952  | 1.086278  |
| 40 | 1  | 0 | -0.795905 | 1.905145  | 3.246632  |
| 41 | 1  | 0 | -3.368904 | 1.843941  | 2.453678  |
| 42 | 1  | 0 | -3.432587 | 2.378035  | -0.182389 |
| 43 | 6  | 0 | 2.187479  | -0.447010 | -0.213142 |
| 44 | 14 | 0 | 3.663218  | -1.689049 | -0.124389 |
| 45 | 1  | 0 | 2.551064  | 0.495560  | 0.216157  |
| 46 | 1  | 0 | 1.999140  | -0.252257 | -1.279268 |
| 47 | 6  | 0 | 4.103951  | -2.005125 | 1.688242  |
| 48 | 6  | 0 | 3.188753  | -3.309771 | -0.987548 |
| 49 | 6  | 0 | 5.123647  | -0.858022 | -1.045980 |
| 50 | 1  | 0 | 4.951617  | -2.696127 | 1.764765  |
| 51 | 1  | 0 | 4.384874  | -1.078589 | 2.201857  |
| 52 | 1  | 0 | 3.265611  | -2.452789 | 2.234247  |
| 53 | 1  | 0 | 2.902414  | -3.143369 | -2.032965 |
| 54 | 1  | 0 | 4.033886  | -4.007938 | -0.987486 |
| 55 | 1  | 0 | 2.356047  | -3.811383 | -0.479556 |
| 56 | 6  | 0 | 5.510277  | 0.448838  | -0.435139 |
| 57 | 1  | 0 | 4.836657  | -0.729541 | -2.098248 |
| 58 | 1  | 0 | 5.967362  | -1.562707 | -1.029485 |
| 59 | 6  | 0 | 5.221696  | 1.663628  | -0.939580 |
| 60 | 1  | 0 | 6.051189  | 0.399513  | 0.511872  |
| 61 | 1  | 0 | 4.699308  | 1.732595  | -1.896376 |
| 62 | 6  | 0 | 5.576738  | 2.919780  | -0.302393 |
| 63 | 6  | 0 | 5.292311  | 4.131564  | -0.802546 |
| 64 | 1  | 0 | 6.114688  | 2.848004  | 0.643901  |
| 65 | 1  | 0 | 5.585704  | 5.043434  | -0.291283 |
| 66 | 1  | 0 | 4.768680  | 4.249172  | -1.749455 |

-----

2SIBTS<sup>2</sup>

| Center<br>Number | Atomic<br>Number | Atomic<br>Type | Coordinates (Angstroms) |           |           |
|------------------|------------------|----------------|-------------------------|-----------|-----------|
|                  |                  |                | X                       | Y         | Z         |
| 1                | 21               | 0              | 0.605052                | -1.866060 | -0.089759 |
| 2                | 6                | 0              | 2.353793                | -0.233412 | 1.173206  |
| 3                | 1                | 0              | 1.657903                | 0.598918  | 1.312873  |

|    |    |   |           |           |           |
|----|----|---|-----------|-----------|-----------|
| 4  | 6  | 0 | 2.598881  | -0.503837 | -0.230949 |
| 5  | 6  | 0 | 1.778976  | -0.145581 | -1.277989 |
| 6  | 1  | 0 | 2.098538  | -0.412162 | -2.282631 |
| 7  | 6  | 0 | -0.223795 | -4.126373 | -0.559657 |
| 8  | 6  | 0 | 1.178174  | -4.148982 | -0.765206 |
| 9  | 6  | 0 | 1.474669  | -3.305888 | -1.862712 |
| 10 | 6  | 0 | 0.255055  | -2.751329 | -2.330102 |
| 11 | 6  | 0 | -0.794951 | -3.258832 | -1.522946 |
| 12 | 1  | 0 | 3.497168  | -1.074238 | -0.470912 |
| 13 | 6  | 0 | 1.358424  | -1.553528 | 2.388941  |
| 14 | 6  | 0 | 0.291910  | -2.460864 | 2.073014  |
| 15 | 1  | 0 | 1.081339  | -0.682722 | 2.983179  |
| 16 | 1  | 0 | 2.252384  | -2.046806 | 2.759883  |
| 17 | 6  | 0 | -1.029661 | -2.041214 | 1.721310  |
| 18 | 6  | 0 | -1.373478 | -0.760180 | 1.343662  |
| 19 | 1  | 0 | -1.778737 | -2.821723 | 1.595189  |
| 20 | 1  | 0 | -0.672595 | 0.046404  | 1.580640  |
| 21 | 1  | 0 | 0.476651  | -3.524058 | 2.197098  |
| 22 | 6  | 0 | 0.524470  | 0.663788  | -1.157693 |
| 23 | 6  | 0 | 0.027237  | 1.229182  | -2.498736 |
| 24 | 1  | 0 | -0.333093 | 0.080206  | -0.710599 |
| 25 | 1  | 0 | 0.649042  | 1.495180  | -0.450190 |
| 26 | 1  | 0 | 0.822637  | 1.867510  | -2.898393 |
| 27 | 1  | 0 | -0.099689 | 0.408492  | -3.214946 |
| 28 | 6  | 0 | -1.280595 | 1.975172  | -2.365462 |
| 29 | 6  | 0 | -1.369303 | 3.204477  | -1.672310 |
| 30 | 6  | 0 | -2.447549 | 1.408753  | -2.886620 |
| 31 | 7  | 0 | -0.171826 | 3.802786  | -1.173178 |
| 32 | 6  | 0 | -2.627257 | 3.791270  | -1.487494 |
| 33 | 6  | 0 | -3.694612 | 2.008064  | -2.712231 |
| 34 | 1  | 0 | -2.377036 | 0.473548  | -3.439506 |
| 35 | 6  | 0 | -0.322722 | 4.614055  | 0.026232  |
| 36 | 6  | 0 | 0.576414  | 4.538101  | -2.194929 |
| 37 | 1  | 0 | -2.706615 | 4.735361  | -0.957036 |
| 38 | 6  | 0 | -3.782223 | 3.198066  | -1.996255 |
| 39 | 1  | 0 | -4.584637 | 1.549800  | -3.134130 |
| 40 | 1  | 0 | -0.816466 | 5.585116  | -0.151312 |
| 41 | 1  | 0 | 0.672195  | 4.825841  | 0.433595  |
| 42 | 1  | 0 | -0.896244 | 4.066707  | 0.780206  |
| 43 | 1  | 0 | 0.673267  | 3.944302  | -3.106783 |
| 44 | 1  | 0 | 1.580501  | 4.765176  | -1.819837 |
| 45 | 1  | 0 | 0.084177  | 5.487539  | -2.465546 |
| 46 | 1  | 0 | -4.744281 | 3.682357  | -1.850808 |
| 47 | 1  | 0 | -0.764736 | -4.688730 | 0.191089  |
| 48 | 1  | 0 | -1.850159 | -3.034073 | -1.631631 |
| 49 | 1  | 0 | 1.897516  | -4.722984 | -0.190998 |
| 50 | 1  | 0 | 2.462565  | -3.119464 | -2.268701 |
| 51 | 1  | 0 | 0.141490  | -2.083960 | -3.175994 |
| 52 | 6  | 0 | 3.594962  | -0.117423 | 2.040195  |
| 53 | 14 | 0 | 4.777213  | 1.386838  | 1.717754  |
| 54 | 1  | 0 | 4.203478  | -1.026649 | 1.935140  |
| 55 | 6  | 0 | 3.921450  | 2.738685  | 0.703832  |
| 56 | 6  | 0 | 5.295689  | 2.068681  | 3.405440  |
| 57 | 6  | 0 | 6.349728  | 0.752275  | 0.816241  |
| 58 | 1  | 0 | 4.600240  | 3.588088  | 0.563018  |
| 59 | 1  | 0 | 3.617643  | 2.386657  | -0.287857 |
| 60 | 1  | 0 | 3.030052  | 3.116454  | 1.218720  |
| 61 | 1  | 0 | 5.766979  | 1.295800  | 4.023649  |
| 62 | 1  | 0 | 6.016929  | 2.886144  | 3.291750  |
| 63 | 1  | 0 | 4.434847  | 2.461994  | 3.959027  |
| 64 | 6  | 0 | 6.097385  | 0.141597  | -0.519211 |
| 65 | 1  | 0 | 6.847117  | 0.037354  | 1.485356  |
| 66 | 1  | 0 | 7.021597  | 1.617969  | 0.722287  |
| 67 | 6  | 0 | 6.153135  | -1.174255 | -0.806912 |
| 68 | 1  | 0 | 5.830345  | 0.830801  | -1.323312 |
| 69 | 1  | 0 | 6.440487  | -1.881129 | -0.025716 |
| 70 | 6  | 0 | 5.864672  | -1.731580 | -2.118048 |
| 71 | 6  | 0 | 5.874284  | -3.042524 | -2.412009 |
| 72 | 1  | 0 | 5.640107  | -1.013448 | -2.908899 |

|    |    |   |           |           |           |
|----|----|---|-----------|-----------|-----------|
| 73 | 1  | 0 | 5.674728  | -3.402975 | -3.416853 |
| 74 | 1  | 0 | 6.119178  | -3.793031 | -1.662850 |
| 75 | 1  | 0 | 3.306870  | -0.059796 | 3.097950  |
| 76 | 6  | 0 | -2.741686 | -0.343451 | 0.924417  |
| 77 | 14 | 0 | -3.847229 | 0.338162  | 2.356683  |
| 78 | 1  | 0 | -3.295042 | -1.187205 | 0.492577  |
| 79 | 1  | 0 | -2.702621 | 0.442885  | 0.159278  |
| 80 | 6  | 0 | -3.920654 | -0.924712 | 3.762901  |
| 81 | 6  | 0 | -3.147474 | 1.988994  | 2.970303  |
| 82 | 6  | 0 | -5.579313 | 0.602300  | 1.580897  |
| 83 | 1  | 0 | -4.576279 | -0.569075 | 4.566433  |
| 84 | 1  | 0 | -4.312501 | -1.888347 | 3.418141  |
| 85 | 1  | 0 | -2.930996 | -1.099588 | 4.200084  |
| 86 | 1  | 0 | -3.084350 | 2.719350  | 2.155250  |
| 87 | 1  | 0 | -3.789306 | 2.416331  | 3.749408  |
| 88 | 1  | 0 | -2.146570 | 1.870776  | 3.402865  |
| 89 | 6  | 0 | -6.196344 | -0.680075 | 1.128471  |
| 90 | 1  | 0 | -5.468124 | 1.303475  | 0.743208  |
| 91 | 1  | 0 | -6.209727 | 1.096165  | 2.333720  |
| 92 | 6  | 0 | -6.250167 | -1.116492 | -0.144573 |
| 93 | 1  | 0 | -6.609632 | -1.319990 | 1.910348  |
| 94 | 1  | 0 | -5.855545 | -0.482070 | -0.941169 |
| 95 | 6  | 0 | -6.820724 | -2.389616 | -0.548735 |
| 96 | 6  | 0 | -6.878489 | -2.829162 | -1.814829 |
| 97 | 1  | 0 | -7.228011 | -3.012717 | 0.248694  |
| 98 | 1  | 0 | -7.322364 | -3.787484 | -2.066879 |
| 99 | 1  | 0 | -6.495567 | -2.235423 | -2.642834 |

3SIBTS<sup>3</sup>

| Center<br>Number | Atomic<br>Number | Atomic<br>Type | Coordinates (Angstroms) |           |           |
|------------------|------------------|----------------|-------------------------|-----------|-----------|
|                  |                  |                | X                       | Y         | Z         |
| 1                | 21               | 0              | 1.662160                | 2.122444  | -0.977777 |
| 2                | 6                | 0              | -0.821369               | 2.792153  | -0.100419 |
| 3                | 1                | 0              | -0.795237               | 2.146554  | 0.781217  |
| 4                | 6                | 0              | -0.743025               | 2.033645  | -1.333567 |
| 5                | 6                | 0              | -0.253044               | 0.752983  | -1.474828 |
| 6                | 1                | 0              | -0.257399               | 0.318330  | -2.470098 |
| 7                | 6                | 0              | 3.685083                | 2.883643  | -2.121456 |
| 8                | 6                | 0              | 2.591711                | 3.173348  | -2.975856 |
| 9                | 6                | 0              | 2.025412                | 1.942901  | -3.390916 |
| 10               | 6                | 0              | 2.755779                | 0.892759  | -2.780162 |
| 11               | 6                | 0              | 3.781394                | 1.476258  | -1.993948 |
| 12               | 1                | 0              | -1.052601               | 2.553713  | -2.242114 |
| 13               | 6                | 0              | 0.710906                | 4.030659  | 0.535977  |
| 14               | 6                | 0              | 2.127013                | 3.889573  | 0.371338  |
| 15               | 1                | 0              | 0.324884                | 3.839828  | 1.536957  |
| 16               | 1                | 0              | 0.300629                | 4.931152  | 0.087629  |
| 17               | 6                | 0              | 2.902848                | 2.862870  | 0.998036  |
| 18               | 6                | 0              | 2.379094                | 1.711505  | 1.545609  |
| 19               | 1                | 0              | 3.984923                | 2.925579  | 0.890324  |
| 20               | 1                | 0              | 1.304551                | 1.689797  | 1.754302  |
| 21               | 1                | 0              | 2.650775                | 4.661621  | -0.184208 |
| 22               | 6                | 0              | 0.165585                | -0.134613 | -0.341036 |
| 23               | 6                | 0              | -0.069258               | -1.660084 | -0.575825 |
| 24               | 1                | 0              | 1.255023                | -0.023958 | -0.087675 |
| 25               | 1                | 0              | -0.353286               | 0.152169  | 0.582229  |
| 26               | 1                | 0              | 4.342830                | 3.611225  | -1.662782 |
| 27               | 1                | 0              | 4.522194                | 0.936034  | -1.415581 |
| 28               | 1                | 0              | 2.260841                | 4.162191  | -3.275576 |
| 29               | 1                | 0              | 1.184956                | 1.827646  | -4.065501 |
| 30               | 1                | 0              | 2.586738                | -0.168686 | -2.912127 |
| 31               | 6                | 0              | -1.922973               | 3.827007  | -0.036206 |
| 32               | 14               | 0              | -3.719314               | 3.138450  | 0.123968  |
| 33               | 1                | 0              | -1.899761               | 4.477546  | -0.921159 |
| 34               | 6                | 0              | -4.221199               | 2.165569  | -1.421265 |
| 35               | 6                | 0              | -3.840582               | 2.046263  | 1.667849  |
| 36               | 6                | 0              | -4.830564               | 4.685254  | 0.324271  |



|     |    |   |           |           |           |
|-----|----|---|-----------|-----------|-----------|
| 37  | 1  | 0 | -5.271507 | 1.859431  | -1.346760 |
| 38  | 1  | 0 | -4.117348 | 2.768843  | -2.330314 |
| 39  | 1  | 0 | -3.624113 | 1.255303  | -1.545850 |
| 40  | 1  | 0 | -3.541306 | 2.590319  | 2.571450  |
| 41  | 1  | 0 | -4.872116 | 1.706422  | 1.815813  |
| 42  | 1  | 0 | -3.215683 | 1.148834  | 1.587847  |
| 43  | 6  | 0 | -4.778029 | 5.584260  | -0.868381 |
| 44  | 1  | 0 | -4.514608 | 5.217494  | 1.231493  |
| 45  | 1  | 0 | -5.856745 | 4.333491  | 0.503197  |
| 46  | 6  | 0 | -4.107123 | 6.749405  | -0.941800 |
| 47  | 1  | 0 | -5.316315 | 5.243154  | -1.754811 |
| 48  | 1  | 0 | -3.579655 | 7.117493  | -0.059113 |
| 49  | 6  | 0 | -4.046856 | 7.584515  | -2.128828 |
| 50  | 6  | 0 | -3.382427 | 8.747093  | -2.205364 |
| 51  | 1  | 0 | -4.590381 | 7.223946  | -3.003261 |
| 52  | 1  | 0 | -3.373436 | 9.340451  | -3.114688 |
| 53  | 1  | 0 | -2.836050 | 9.148911  | -1.354240 |
| 54  | 1  | 0 | -1.781417 | 4.484574  | 0.832454  |
| 55  | 6  | 0 | 3.187121  | 0.624982  | 2.170314  |
| 56  | 14 | 0 | 3.469047  | 0.847885  | 4.071988  |
| 57  | 1  | 0 | 4.185546  | 0.561112  | 1.719427  |
| 58  | 1  | 0 | 2.705825  | -0.352555 | 2.036134  |
| 59  | 6  | 0 | 4.252958  | 2.537910  | 4.398152  |
| 60  | 6  | 0 | 1.814444  | 0.684706  | 4.981407  |
| 61  | 6  | 0 | 4.657420  | -0.562479 | 4.592650  |
| 62  | 1  | 0 | 4.444437  | 2.672184  | 5.469225  |
| 63  | 1  | 0 | 5.209983  | 2.644061  | 3.874917  |
| 64  | 1  | 0 | 3.598874  | 3.356252  | 4.076400  |
| 65  | 1  | 0 | 1.334611  | -0.278512 | 4.772654  |
| 66  | 1  | 0 | 1.960743  | 0.753360  | 6.065586  |
| 67  | 1  | 0 | 1.116046  | 1.481047  | 4.697080  |
| 68  | 6  | 0 | 5.990583  | -0.453552 | 3.928285  |
| 69  | 1  | 0 | 4.177279  | -1.521974 | 4.358599  |
| 70  | 1  | 0 | 4.761243  | -0.516226 | 5.686130  |
| 71  | 6  | 0 | 6.415094  | -1.204059 | 2.893829  |
| 72  | 1  | 0 | 6.656990  | 0.322765  | 4.309007  |
| 73  | 1  | 0 | 5.770196  | -1.998262 | 2.511224  |
| 74  | 6  | 0 | 7.705167  | -1.046770 | 2.245026  |
| 75  | 6  | 0 | 8.132699  | -1.791789 | 1.214816  |
| 76  | 1  | 0 | 8.355485  | -0.266379 | 2.642578  |
| 77  | 1  | 0 | 9.110470  | -1.639989 | 0.767716  |
| 78  | 1  | 0 | 7.521320  | -2.588131 | 0.794523  |
| 79  | 6  | 0 | 0.764818  | -2.227298 | -1.731912 |
| 80  | 14 | 0 | 0.413218  | -4.034434 | -2.284798 |
| 81  | 1  | 0 | 1.835433  | -2.157233 | -1.487785 |
| 82  | 1  | 0 | 0.624693  | -1.621099 | -2.638777 |
| 83  | 6  | 0 | 1.037667  | -5.306653 | -1.029256 |
| 84  | 6  | 0 | -1.440643 | -4.257336 | -2.609092 |
| 85  | 6  | 0 | 1.363015  | -4.257873 | -3.939132 |
| 86  | 1  | 0 | 0.911201  | -6.321737 | -1.424479 |
| 87  | 1  | 0 | 2.102387  | -5.167920 | -0.808565 |
| 88  | 1  | 0 | 0.487512  | -5.243788 | -0.085104 |
| 89  | 1  | 0 | -1.801456 | -3.542649 | -3.358723 |
| 90  | 1  | 0 | -1.638917 | -5.264512 | -2.994677 |
| 91  | 1  | 0 | -2.039577 | -4.126246 | -1.699833 |
| 92  | 6  | 0 | 2.818545  | -3.952852 | -3.822611 |
| 93  | 1  | 0 | 0.891907  | -3.621786 | -4.700670 |
| 94  | 1  | 0 | 1.209906  | -5.300161 | -4.255960 |
| 95  | 6  | 0 | 3.445446  | -2.892522 | -4.367711 |
| 96  | 1  | 0 | 3.413165  | -4.648476 | -3.226436 |
| 97  | 1  | 0 | 2.876084  | -2.200926 | -4.993031 |
| 98  | 6  | 0 | 4.861036  | -2.608726 | -4.205972 |
| 99  | 6  | 0 | 5.497751  | -1.563573 | -4.756724 |
| 100 | 1  | 0 | 5.428130  | -3.313960 | -3.596383 |
| 101 | 1  | 0 | 6.562381  | -1.404397 | -4.613906 |
| 102 | 1  | 0 | 4.975869  | -0.844231 | -5.384918 |
| 103 | 6  | 0 | 0.217972  | -2.383251 | 0.717404  |
| 104 | 6  | 0 | -0.659079 | -2.734311 | 1.668329  |
| 105 | 1  | 0 | 1.271569  | -2.619476 | 0.882057  |

|     |   |   |           |           |           |
|-----|---|---|-----------|-----------|-----------|
| 106 | 1 | 0 | -0.257833 | -3.242361 | 2.547688  |
| 107 | 6 | 0 | -2.144835 | -2.530020 | 1.688164  |
| 108 | 6 | 0 | -2.916894 | -3.828834 | 2.004210  |
| 109 | 1 | 0 | -2.393740 | -1.789143 | 2.463271  |
| 110 | 1 | 0 | -2.512491 | -2.123818 | 0.739238  |
| 111 | 1 | 0 | -2.694808 | -4.560766 | 1.224248  |
| 112 | 1 | 0 | -2.545260 | -4.242332 | 2.951246  |
| 113 | 6 | 0 | -4.401932 | -3.573750 | 2.112927  |
| 114 | 6 | 0 | -5.269399 | -3.713638 | 1.008501  |
| 115 | 6 | 0 | -4.924430 | -3.104029 | 3.321817  |
| 116 | 7 | 0 | -4.749721 | -4.226388 | -0.222822 |
| 117 | 6 | 0 | -6.615410 | -3.351469 | 1.147502  |
| 118 | 6 | 0 | -6.264973 | -2.748706 | 3.454471  |
| 119 | 1 | 0 | -4.257848 | -3.007182 | 4.177541  |
| 120 | 6 | 0 | -5.384350 | -3.720472 | -1.429316 |
| 121 | 6 | 0 | -4.690229 | -5.687285 | -0.244027 |
| 122 | 1 | 0 | -7.290715 | -3.461311 | 0.303917  |
| 123 | 6 | 0 | -7.110706 | -2.863680 | 2.355098  |
| 124 | 1 | 0 | -6.642736 | -2.386076 | 4.406664  |
| 125 | 1 | 0 | -6.394375 | -4.129578 | -1.611192 |
| 126 | 1 | 0 | -4.764276 | -3.988740 | -2.292393 |
| 127 | 1 | 0 | -5.457440 | -2.629769 | -1.381703 |
| 128 | 1 | 0 | -4.193580 | -6.061935 | 0.654920  |
| 129 | 1 | 0 | -4.117700 | -6.016842 | -1.118606 |
| 130 | 1 | 0 | -5.692839 | -6.147466 | -0.292855 |
| 131 | 1 | 0 | -8.160178 | -2.592513 | 2.437304  |
| 132 | 1 | 0 | -1.134927 | -1.760768 | -0.817709 |

-----

2SIB2SIBTS

| Center<br>Number | Atomic<br>Number | Atomic<br>Type | Coordinates (Angstroms) |           |           |
|------------------|------------------|----------------|-------------------------|-----------|-----------|
|                  |                  |                | X                       | Y         | Z         |
| 1                | 21               | 0              | 5.252307                | 1.807809  | 0.301568  |
| 2                | 6                | 0              | 7.085503                | -0.382356 | -1.063094 |
| 3                | 1                | 0              | 6.283411                | -1.064857 | -0.751850 |
| 4                | 6                | 0              | 7.553793                | 0.431393  | 0.109775  |
| 5                | 6                | 0              | 7.069228                | 0.461741  | 1.375237  |
| 6                | 1                | 0              | 7.588991                | 1.103292  | 2.086421  |
| 7                | 6                | 0              | 3.650574                | 3.564079  | 0.760733  |
| 8                | 6                | 0              | 4.768882                | 4.169166  | 0.129130  |
| 9                | 6                | 0              | 5.880695                | 4.044064  | 0.999879  |
| 10               | 6                | 0              | 5.451021                | 3.367403  | 2.168965  |
| 11               | 6                | 0              | 4.072305                | 3.065903  | 2.019187  |
| 12               | 1                | 0              | 8.409094                | 1.079046  | -0.089238 |
| 13               | 6                | 0              | 6.564307                | 0.546825  | -2.206006 |
| 14               | 6                | 0              | 5.505650                | 1.636471  | -1.972827 |
| 15               | 1                | 0              | 6.210521                | -0.123863 | -3.002881 |
| 16               | 1                | 0              | 7.446241                | 1.057550  | -2.609805 |
| 17               | 6                | 0              | 4.122479                | 1.390522  | -1.761467 |
| 18               | 6                | 0              | 3.591427                | 0.434407  | -0.902632 |
| 19               | 1                | 0              | 3.439860                | 2.185058  | -2.071968 |
| 20               | 1                | 0              | 4.216678                | -0.439123 | -0.673269 |
| 21               | 1                | 0              | 5.706423                | 2.533351  | -2.556570 |
| 22               | 6                | 0              | 5.927396                | -0.350131 | 1.935049  |
| 23               | 1                | 0              | 5.034560                | 0.260352  | 2.193948  |
| 24               | 1                | 0              | 5.611473                | -1.171030 | 1.287002  |
| 25               | 1                | 0              | 2.647115                | 3.501435  | 0.357333  |
| 26               | 1                | 0              | 3.445173                | 2.569879  | 2.752516  |
| 27               | 1                | 0              | 4.772142                | 4.654982  | -0.838913 |
| 28               | 1                | 0              | 6.884814                | 4.406587  | 0.807350  |
| 29               | 1                | 0              | 6.064120                | 3.139249  | 3.033588  |
| 30               | 6                | 0              | 8.247372                | -1.232266 | -1.634621 |
| 31               | 14               | 0              | 9.089395                | -2.654911 | -0.633921 |
| 32               | 1                | 0              | 9.044367                | -0.549798 | -1.964686 |
| 33               | 6                | 0              | 7.968822                | -3.306173 | 0.751636  |
| 34               | 6                | 0              | 9.453821                | -4.041024 | -1.867883 |
| 35               | 6                | 0              | 10.757068               | -2.031151 | 0.081676  |
| 36               | 1                | 0              | 8.419867                | -4.196601 | 1.205025  |

|     |    |   |           |           |           |
|-----|----|---|-----------|-----------|-----------|
| 37  | 1  | 0 | 7.824429  | -2.572847 | 1.552373  |
| 38  | 1  | 0 | 6.984626  | -3.605015 | 0.370311  |
| 39  | 1  | 0 | 10.068525 | -3.684250 | -2.702371 |
| 40  | 1  | 0 | 9.998421  | -4.860169 | -1.384649 |
| 41  | 1  | 0 | 8.530979  | -4.459285 | -2.286880 |
| 42  | 6  | 0 | 10.625907 | -0.938633 | 1.085177  |
| 43  | 1  | 0 | 11.377414 | -1.712631 | -0.766677 |
| 44  | 1  | 0 | 11.253881 | -2.905179 | 0.526247  |
| 45  | 6  | 0 | 10.885515 | 0.366586  | 0.870392  |
| 46  | 1  | 0 | 10.273688 | -1.233499 | 2.076171  |
| 47  | 1  | 0 | 11.265271 | 0.684234  | -0.102996 |
| 48  | 6  | 0 | 10.701312 | 1.403994  | 1.871118  |
| 49  | 6  | 0 | 10.876542 | 2.718998  | 1.655133  |
| 50  | 1  | 0 | 10.414503 | 1.065853  | 2.868944  |
| 51  | 1  | 0 | 10.752464 | 3.448756  | 2.449898  |
| 52  | 1  | 0 | 11.199438 | 3.100071  | 0.688090  |
| 53  | 1  | 0 | 7.870278  | -1.700082 | -2.555303 |
| 54  | 6  | 0 | 2.120048  | 0.252538  | -0.639521 |
| 55  | 14 | 0 | 1.326263  | -1.060333 | -1.813602 |
| 56  | 1  | 0 | 1.590240  | 1.204749  | -0.778403 |
| 57  | 1  | 0 | 1.940028  | -0.065775 | 0.397108  |
| 58  | 6  | 0 | 1.487803  | -0.474509 | -3.602425 |
| 59  | 6  | 0 | 2.193044  | -2.724884 | -1.561826 |
| 60  | 1  | 0 | 1.082768  | -1.219811 | -4.296982 |
| 61  | 1  | 0 | 0.960544  | 0.470284  | -3.776349 |
| 62  | 1  | 0 | 2.539426  | -0.322253 | -3.870421 |
| 63  | 1  | 0 | 2.136963  | -3.061422 | -0.519792 |
| 64  | 1  | 0 | 1.733144  | -3.501391 | -2.183921 |
| 65  | 1  | 0 | 3.250600  | -2.672934 | -1.845878 |
| 66  | 1  | 0 | 6.218939  | -0.776999 | 2.901646  |
| 67  | 6  | 0 | -0.538703 | -1.329463 | -1.378797 |
| 68  | 6  | 0 | -1.445606 | -0.147330 | -1.553632 |
| 69  | 1  | 0 | -0.854147 | -2.155780 | -2.031350 |
| 70  | 6  | 0 | -1.927300 | 0.291031  | -2.769477 |
| 71  | 1  | 0 | -1.530756 | 0.526129  | -0.695610 |
| 72  | 6  | 0 | -2.841678 | 1.375222  | -2.945151 |
| 73  | 1  | 0 | -1.732429 | -0.328385 | -3.644292 |
| 74  | 21 | 0 | -4.119177 | -0.064034 | -1.726687 |
| 75  | 6  | 0 | -3.137934 | 2.349376  | -1.935959 |
| 76  | 1  | 0 | -3.277080 | 1.520555  | -3.928972 |
| 77  | 6  | 0 | -5.216102 | 1.188199  | 0.050362  |
| 78  | 6  | 0 | -5.822058 | -0.302241 | -3.452555 |
| 79  | 1  | 0 | -2.298477 | 2.684447  | -1.327170 |
| 80  | 1  | 0 | -3.757975 | 3.168819  | -2.287391 |
| 81  | 6  | 0 | -4.143100 | 2.146941  | -0.128123 |
| 82  | 6  | 0 | -5.085624 | -0.113975 | 0.479717  |
| 83  | 1  | 0 | -6.215795 | 1.523460  | -0.231642 |
| 84  | 6  | 0 | -4.653470 | -0.935490 | -3.945505 |
| 85  | 6  | 0 | -6.277788 | -1.040625 | -2.332475 |
| 86  | 1  | 0 | -6.299136 | 0.575507  | -3.875774 |
| 87  | 1  | 0 | -3.250790 | 1.881100  | 0.444789  |
| 88  | 6  | 0 | -4.533625 | 3.599359  | 0.018176  |
| 89  | 1  | 0 | -5.988794 | -0.710443 | 0.568205  |
| 90  | 6  | 0 | -3.807132 | -0.735187 | 0.955342  |
| 91  | 6  | 0 | -4.376716 | -2.050164 | -3.116034 |
| 92  | 1  | 0 | -4.089578 | -0.634382 | -4.819463 |
| 93  | 6  | 0 | -5.382436 | -2.117888 | -2.118894 |
| 94  | 1  | 0 | -7.167125 | -0.824982 | -1.751893 |
| 95  | 14 | 0 | -4.956511 | 4.206989  | 1.804556  |
| 96  | 1  | 0 | -5.406253 | 3.831529  | -0.607808 |
| 97  | 1  | 0 | -3.721660 | 4.253510  | -0.328050 |
| 98  | 6  | 0 | -3.982207 | -1.843487 | 2.040813  |
| 99  | 1  | 0 | -3.218672 | -1.207164 | 0.119757  |
| 100 | 1  | 0 | -3.132132 | 0.034394  | 1.351513  |
| 101 | 1  | 0 | -3.560525 | -2.752631 | -3.240828 |
| 102 | 1  | 0 | -5.470999 | -2.884864 | -1.359489 |
| 103 | 6  | 0 | -6.386258 | 3.217816  | 2.552886  |
| 104 | 6  | 0 | -3.407957 | 4.058063  | 2.890255  |
| 105 | 6  | 0 | -5.454348 | 6.041180  | 1.592445  |

|     |    |   |           |           |           |
|-----|----|---|-----------|-----------|-----------|
| 106 | 6  | 0 | -4.748747 | -3.071251 | 1.530723  |
| 107 | 6  | 0 | -2.615561 | -2.222073 | 2.554128  |
| 108 | 1  | 0 | -4.556609 | -1.376202 | 2.850357  |
| 109 | 1  | 0 | -6.666837 | 3.645179  | 3.523067  |
| 110 | 1  | 0 | -7.276629 | 3.245711  | 1.914662  |
| 111 | 1  | 0 | -6.121852 | 2.168431  | 2.724060  |
| 112 | 1  | 0 | -2.565268 | 4.617827  | 2.467520  |
| 113 | 1  | 0 | -3.603021 | 4.464820  | 3.889309  |
| 114 | 1  | 0 | -3.094335 | 3.015068  | 3.021462  |
| 115 | 6  | 0 | -6.682973 | 6.198475  | 0.754542  |
| 116 | 1  | 0 | -4.606654 | 6.583449  | 1.152523  |
| 117 | 1  | 0 | -5.610946 | 6.459134  | 2.597180  |
| 118 | 14 | 0 | -5.181462 | -4.454664 | 2.800816  |
| 119 | 1  | 0 | -4.188226 | -3.544468 | 0.710481  |
| 120 | 1  | 0 | -5.712646 | -2.766889 | 1.098117  |
| 121 | 6  | 0 | -2.028338 | -1.827598 | 3.692422  |
| 122 | 1  | 0 | -2.061877 | -2.905924 | 1.906666  |
| 123 | 6  | 0 | -6.707508 | 6.612228  | -0.526635 |
| 124 | 1  | 0 | -7.629430 | 5.935872  | 1.230553  |
| 125 | 6  | 0 | -3.676850 | -5.535698 | 3.192501  |
| 126 | 6  | 0 | -5.889694 | -3.690097 | 4.382459  |
| 127 | 6  | 0 | -6.530545 | -5.523138 | 1.954060  |
| 128 | 1  | 0 | -1.031046 | -2.221066 | 3.894901  |
| 129 | 6  | 0 | -2.572796 | -0.924031 | 4.755771  |
| 130 | 1  | 0 | -5.772496 | 6.903285  | -1.010751 |
| 131 | 6  | 0 | -7.914587 | 6.729131  | -1.326665 |
| 132 | 1  | 0 | -3.971748 | -6.375764 | 3.832505  |
| 133 | 1  | 0 | -3.230952 | -5.954832 | 2.282961  |
| 134 | 1  | 0 | -2.901927 | -4.971310 | 3.721127  |
| 135 | 1  | 0 | -6.746693 | -3.039206 | 4.172790  |
| 136 | 1  | 0 | -6.236167 | -4.477135 | 5.062298  |
| 137 | 1  | 0 | -5.138382 | -3.102046 | 4.921820  |
| 138 | 6  | 0 | -6.114624 | -6.039152 | 0.617149  |
| 139 | 1  | 0 | -7.450804 | -4.929053 | 1.873969  |
| 140 | 1  | 0 | -6.750167 | -6.356739 | 2.637480  |
| 141 | 1  | 0 | -1.916679 | -0.055653 | 4.901226  |
| 142 | 1  | 0 | -3.578081 | -0.552618 | 4.538693  |
| 143 | 6  | 0 | -7.939549 | 7.148336  | -2.600363 |
| 144 | 1  | 0 | -8.850777 | 6.460065  | -0.835988 |
| 145 | 6  | 0 | -6.629439 | -5.658679 | -0.568136 |
| 146 | 1  | 0 | -5.315786 | -6.783979 | 0.612956  |
| 147 | 1  | 0 | -8.868760 | 7.230103  | -3.155957 |
| 148 | 1  | 0 | -7.030713 | 7.440500  | -3.123064 |
| 149 | 1  | 0 | -7.455153 | -4.943537 | -0.585696 |
| 150 | 6  | 0 | -6.184456 | -6.171084 | -1.853133 |
| 151 | 6  | 0 | -6.705846 | -5.816954 | -3.038052 |
| 152 | 1  | 0 | -5.377671 | -6.905289 | -1.826880 |
| 153 | 1  | 0 | -6.348922 | -6.246129 | -3.969456 |
| 154 | 1  | 0 | -7.527033 | -5.106485 | -3.110983 |
| 155 | 1  | 0 | -2.608691 | -1.445334 | 5.720865  |
| 156 | 1  | 0 | -0.593177 | -1.711249 | -0.351543 |

---
